# Supplementary material for: Extensive Translatome Remodeling during ER Stress Response in Mammalian Cells
Source: PLoS One. 2012 May 4;7(5):e35915. doi: 10.1371/journal.pone.0035915 (PMC3344847; doi:10.1371/journal.pone.0035915)
Supplement: Table S1 — Translation efficiencies of mRNA encoding some abundant proteins in NIH3T3 and Jurkat cells. The abundance of these mRNAs (A value) is also shown. (XLS) [file pone.0035915.s005.xls]

## Sheet: Hoja1
RefSeq DNA	logP/FM control	RefSeq DNA	logP/FM LV7 control
NR_002181	0.427609	NM_001079686	-0.398169
	-0.983859	NM_134448	-1.45259
NM_198853	-0.894969	NM_009643	-0.36387
NM_003063	0.714531	NM_001081392	-0.900898
	-0.408356	NM_133833	-0.344794
	-0.979566	NM_009600	-2.2512
NM_052902	-0.0413035	NM_001160319	0.429906
NM_080923	-0.206185	NM_172916	-1.19023
NM_014937,NR_003252	0.724076		-0.265185
NM_025225	0.702376	NM_023868	-0.457838
NM_000348	-0.329724		-1.429
	0.239096	NM_001081383	-0.716075
	0.287516	NM_007566	-2.02482
	-0.0436438	NM_010418	0.554577
NM_194314	1.30163	NM_207215	-0.784774
	-0.542554	NM_201389	1.03959
NM_173460	0.401529	NM_030238	-0.962929
	1.03672	NM_001081286	-0.881314
NM_001001957	-3.02297		-1.83187
NM_004202	-0.889964	NM_008512	-0.392889
NM_148910	-0.122042	NM_201385	1.37403
NM_012306	0.950923	NM_001099633	1.52729
NM_003607	1.41013	NM_009693	-0.0595811
NM_001007544	1.10361	NM_021523	0.0862086
	-0.264964	NM_008305	-0.580769
	-0.032183	NM_029851	-0.297963
NM_001639	-0.177705	NM_013630	0.197482
NM_144613	-0.119884	NM_011159	-0.91507
NM_032417,NM_145665	0.299748		0.988081
NM_172209	0.95049	NM_031176	0.698015
NM_032223	0.323179	NM_001081049	-0.861254
NM_024034	-0.0752412	NM_001081362	-0.498402
NM_002761	0.401173	NM_010748	-0.944756
NR_015358	0.227488	NM_001024618	-1.09468
NM_138768	0.545083	NM_194462	-0.939441
NM_014000	1.19549	NM_177184	-0.318219
NM_001024074	-0.0927059		-0.730961
	1.2239	NM_007496	-0.343965
NM_002667	-0.0763209	NM_001031814	-0.566651
	0.455986	NM_001081084	-0.745728
NM_025249	0.115464	NM_019763	-1.14409
	-0.239412	NM_030708	-0.716412
	-1.52607	NM_022814	-0.246571
	0.502633	NM_172882	-0.439381
NM_173666	2.15734	NM_011682	-0.194161
NM_001077620	0.416038		-0.994751
	-0.526885	NM_001081249	-0.690132
NM_003284	-0.0148023	NM_001081001,NM_009765	-1.07708
NM_181846	1.01904	NM_172679	-0.790254
NM_178013	-0.0290811	NM_001085370,NM_007463	-0.862901
NM_005108	1.27638	NM_145223	-0.521224
NM_018667	1.22328	NM_030035	-0.318121
NM_001099289	-0.0378395	NM_173028	-0.622185
	1.16249	NM_011264	-0.921103
NM_006143	0.412595	NM_009791	-0.613891
	1.57969	NM_010414	0.175772
NM_182632	0.199653	NM_007499	-0.407814
NM_007031	1.43521	NM_172771	-0.239564
NR_024330	-0.169036	NM_011240	-1.15616
NM_007150	0.679158	NM_001081302	-1.74993
	-0.119409	NM_013720	-0.836281
NR_027083	-0.528112	NM_029337	-0.982306
NM_018383	0.643561	NM_009886	-0.942333
NM_058243	1.94436	NM_001081422	-0.00685636
NM_003567	1.39419	NM_001081371	-0.445519
	-1.18278	NM_010680	0.134234
	0.519925	NM_032393	-0.013576
NM_024700	1.30212	NM_028194	-1.0291
NM_133326	0.791839	NM_001081363	-1.12953
	1.03649	NM_138679	-1.76126
	1.74403	NM_183162	0.0979497
NM_001142929,NM_020549	-0.507285	NM_007738	-0.628441
	0.379267	NM_030595	-0.673362
NM_001130845	1.13158	NM_001004177,NM_017392	-2.25877
NM_138635	1.2706	NM_008787	-0.153596
NM_145025	0.633649	NM_001045536	-0.504239
NM_144599	1.1981	NM_001004468	0.992658
NM_183001	1.09377	NM_007993	-0.461711
NM_002558	-0.519195	NM_177224	-1.11833
NM_018655	0.145664	NM_001077687,NM_001077688,NM_030695	-0.260613
NM_015522	1.72991	NM_181729	-1.02792
NM_032935	0.865238	NM_001081290	-0.268565
NM_003154	-0.426502	NM_007462	-1.22379
NM_006198	0.682752	NM_010897	-0.856025
NM_032413,NM_197955	1.19916	NM_001081359,NM_001112721	-0.42601
NM_013370	-1.28573	NM_027707,NM_201232	-1.39458
NM_000839	-0.786909	NM_011858	-0.164273
NM_020787	0.693602	NM_175158	-0.0854971
NM_144646	-0.13812	NM_011856	-0.846617
NM_205855	0.398749	NM_010585	-0.987904
NM_019644	0.235001	NM_001081185	0.439085
	-2.25574	NM_029274	0.0471873
NM_003566	0.940194	NM_173368	-0.757842
NM_052959	0.376628	NM_019923	-0.198146
NM_152755	1.31405	NM_013889	-1.01465
NM_052945	-0.0526412	NM_008739	-1.30297
NM_174918	0.0828566	NM_007772	-1.27452
	0.350454	NM_172719	0.0160443
NM_139027	0.0931314	NM_080553	0.497937
NR_026547	0.140877	NM_001081379	0.5046
NM_001040704,NM_152251	0.135083	NM_198033	-0.222977
NM_033228	0.619653	NM_198423	0.275026
NM_005240	-0.663635	NM_010227	0.211278
	0.252283	NM_019864	-0.446464
NM_014654	1.13455	NM_009351	-0.792276
NM_172208	-0.060423	NM_144788	0.162923
NM_024553	0.925348	NM_175229	0.0864565
NM_002372	1.05909	NM_030886	-0.328317
NM_139244	1.89484	NM_134080	-0.122354
NM_002119	0.66458	NM_175210	-0.270518
NM_005170	-1.18378	NM_201637	-0.501311
NM_003741	0.00731531	NM_032610	0.0840223
NM_024933	0.205005	NM_138673	-1.93298
NM_005218	-0.648731	NM_009481	-0.398221
NM_012335	-0.223682	NM_020009	0.450126
NM_003809	-1.27571	NM_001081242	0.519606
NM_145028	-1.03001	NM_011602	-0.0272871
NM_002989	0.398744	NM_001008550	0.147919
NM_016178	-1.55988	NM_025730	0.635578
NM_002559	-0.118592	NM_011424	0.661086
NM_031498	0.298625	NM_007988	-0.33767
NM_014331	2.32695	NM_172867	-0.912382
NM_014956	0.613006	NM_010515	-0.699788
NM_001037499	0.54589	NM_001076554	0.313148
NM_003666	0.533416	NM_010233	-0.30593
NM_033258	0.228927	NM_173762	-0.627131
NM_182975	-0.50938	NM_146009	-0.653424
NM_005551	-0.0662898	NM_008634	-0.86063
NM_033194	-0.549745	NM_177208	0.0137323
NM_080743	0.626189	NM_011308	-0.298272
NM_030769	2.14851	NM_011204	0.414134
NM_153033	-0.409234	NM_133904	-0.280588
NM_001004475	-3.27512	NM_010928	-0.0398657
NM_022003	0.155237	NM_178880	-2.10093
NM_025227	0.936857	NM_001025432	0.577708
	1.17527		-0.368151
	0.15604	NM_001129999,NM_001130000	-0.39567
NM_001040702	-0.260808	NM_007379	0.489729
NM_001035230	0.342759	NM_010437	-0.619958
NM_001943	1.52922	NM_145531	0.0213814
NM_144615	0.684872	NM_175238	-1.26385
NM_006945	-0.388741	NM_008383,NM_177217	0.541461
NM_018841	0.986933	NM_177821	-0.356468
NM_004126	0.248389	NM_019389,NM_172955	0.367835
NM_024809	1.78559	NM_134063	-0.515541
NM_032495,NM_139211,NM_139212	-0.0981312	NM_198703	0.0252299
NM_024776	1.09164	NM_001081035	-1.23419
NM_001014291	-0.865044	NM_175836	-0.744155
NM_021955	-0.248539	NM_133780	0.43524
	1.18256	NM_153125	-0.0174094
NM_021117	0.367679	NM_207221	-0.690038
NM_012231	-0.564567	NM_133360	-0.0126563
NM_001018025	0.325235	NM_018814	-0.223334
NM_001003938	-0.147831	NM_138659	0.0699381
NM_012202	-1.88869	NM_012018	-0.645005
NM_001001659	-0.567095	NM_001160400	1.37362
NM_153837	0.215792	NM_013675	-0.407011
	-0.730721	NM_139001	0.706209
NM_020731	1.04603	NM_001017985	0.168408
	0.426733	NM_001081306	-0.400172
NM_173500	0.237427	NM_145125	-0.316793
NM_014388	0.954367	NM_026700,NM_027293	-0.0170353
NM_022640	0.0956286	NM_011132	-0.786852
NM_000333	0.581675	NM_001080819	-0.324775
NM_139011	-0.0118541	NM_011789	-0.950121
NM_017410	1.153	NM_013454	-0.886106
NR_026784	-0.853756	NM_001103179	-0.641644
NM_006829	-0.455264	NM_175551	-1.56764
	-0.00930274	NM_026375	-0.487694
NM_001040100	0.23757	NM_027389	-0.351873
NM_017412	3.03783	NM_018748	-0.96388
NM_001014985	0.113909	NM_021346,NM_207671	-0.823391
NM_003505	1.57395	NM_001002004	0.380211
NM_197954	1.17071	NM_023525	0.135739
NM_144632	-0.0575934	NM_026748	0.0517921
NM_000106	-1.51053	NM_001042421	-0.761612
NM_006187	0.0891991	NM_001146089,NM_198007	-0.823824
	0.818344	NM_021521	-0.123471
NM_001040703,NM_152250	-0.567825	NM_172549	0.551191
NM_205854	0.594878	NM_008663	-0.616963
NM_016499	-0.745031	NM_172800	-1.10515
NM_152636	1.61356	NM_175375	-1.69369
NM_032471,NM_181794,NM_181795	-0.239492	NM_001080931	-1.11741
NM_015555	-0.135	NM_001033258	-0.561322
NM_032237	2.76468	NM_153153	-1.0554
NM_178564	1.36316	NM_013850	0.110993
NM_001864	0.375543	NM_020027	1.3082
NM_003320	0.77519	NM_009260	-2.37532
NM_003122	0.413875	NM_001005510	-0.248422
NM_006685	-1.40842	NM_144835	0.0873982
NM_020666	-1.42135	NM_177214	0.715811
NM_024612	1.69917	NM_007424	-0.752585
NM_173080	0.768386	NM_019973	-0.971625
NM_080742	-1.25832	NM_001001182	-1.50234
	-0.580889	NM_029617	-0.803579
NM_022006	0.190484	NM_001014976	0.347177
NM_181774	-1.31183	NM_032394	1.31936
NM_205841	0.332999	NM_001081453	-1.56325
	0.229368	NM_001081270	0.28811
NM_000766	-0.187424	NM_177030	-0.127514
NM_001011703	1.09415	NM_207239	0.314657
NM_182557	1.0537	NM_001128307,NM_001128308	-0.548721
NM_014719	2.17702	NM_028785	-0.208972
NM_005386	-0.556707	NM_001077694	0.360457
NM_032569	0.24658	NM_026082	0.247151
NM_002090	-1.10664	NM_133947	1.17661
NM_138386	0.984727	NM_172268	-0.197647
	0.700814	NM_029654	0.520677
NM_133329	1.76217	NM_001009947	-0.0791276
NM_004850	2.29934	NM_001081179	0.468216
NM_013264	1.34082	NM_019825	-0.0555544
NM_138367	0.286802	NM_027513	0.998621
NM_012454	0.138494	NM_019472	-0.0555966
NR_024337	-0.0418886	NM_001081116	0.420774
NM_152426	-0.0155788	NM_007708	-0.2179
NM_005226	0.515525	NM_010820	-0.939974
NM_001645	0.00918684	NM_011086	-0.624512
NM_006205	-0.4453	NM_001099634	0.697861
NM_020229	-0.158876	NM_008224	0.50586
NM_002821	0.679376	NM_001001983	0.0664954
NM_013356	0.17403	NM_001025572	-1.18754
NM_003747	1.2654	NM_177171	0.333959
	-0.0860515	NM_008697	-0.105806
NM_014869	1.44149	NM_025276	-0.594813
NM_000104	2.17436	NM_011586	0.509347
NM_006799	0.326238	NM_001112714,NM_019994	-0.878739
NM_181337	0.135823	NM_001081340	-0.640219
NM_003225	0.0307195	NM_144868	1.29333
NM_152762	0.552747	NM_133975	-0.841595
NM_000267	0.926149	NM_023662	-0.328637
NM_002286	-1.56027	NM_001081080	-0.471102
NM_015296	1.76175	NM_178912	-0.2765
NM_004055	0.613467	NM_146019	0.592581
NM_130782	1.75015	NM_011607	0.142707
NM_002277	0.160805	NM_146191	0.71981
	0.480024	NM_029437	0.0699672
NM_015833	1.50636	NM_172122	1.16912
	0.25697	NM_001099298	-0.386569
NM_005291	-0.0626223	NM_001081149	0.565885
NM_005099	-0.409486	NM_031875	-0.0337043
NM_152997	0.96261	NM_181071	-0.0832049
NM_182499	-0.260064	NM_001033261	-2.20708
	0.556515	NM_028021	-0.284052
	0.0415167	NM_001114140	-0.211851
NM_001039661	0.538611	NM_009441	-1.04246
NM_006076	0.711405	NM_172803	-0.755836
NM_030770	-1.50216	NM_175260	-0.52726
	-3.37523	NM_028446	-1.24323
NM_013433	0.158256	NM_019434	0.380505
NM_001012506,NM_001141947,NR_024460	0.596083	NM_013735	0.645622
NM_206966	0.0304205	NM_013836	-1.64633
NM_147197	-0.112167		-0.0715954
NM_032430	-0.233023	NM_001122978,NM_011997	-0.852813
NM_001025247	1.10726	NM_001142322,NM_001142323,NM_015742	0.767554
NM_015059	1.43461	NM_146005,NM_170689	-0.431209
NM_025205	0.445808	NM_022410	-0.923958
NM_138819	0.212804	NM_001081061	-1.14886
NM_002602	-0.0922539	NM_001081014	-0.857373
	-1.93718	NM_001081376	-0.836194
NM_012296	1.04577	NM_139300	-2.07933
	0.204409	NM_001128084	-0.719391
NM_152334	1.61849	NM_008569	-0.505785
NM_178354	0.282426	NM_030679	-0.808773
	0.166139	NM_013607	-0.931337
NM_014996	1.9459	NM_080728	-0.5025
NM_001142782	2.35363	NM_009089	-0.650743
NM_003874	1.17268	NM_177389	0.0353047
	-1.85492	NM_001081078	-0.720012
NM_001037558	0.81359	NM_008717	-1.44339
NM_002988	0.138257	NM_026376	-0.598475
NM_153461	0.343191	NM_001081013	-1.3767
NM_018984	0.457653	NM_145979	0.830723
NM_001042610	0.30362	NM_194348	0.0466461
NM_152901	0.800137	NM_144925	-0.511147
NM_003125	1.10199	NM_001033196	0.461398
	-1.0145	NM_011218	0.926772
NM_175900	0.801977	NM_148948	0.175058
NM_001040667	-0.356277	NM_001081008	-0.533234
NM_147198	0.114491	NM_198022	0.342733
NR_026543	-0.086332	NM_172424	0.00562222
NM_198480	0.639565	NM_011213	0.748614
NM_199168	0.143952	NM_008882	-0.102499
NM_006671	0.132527	NM_008881	0.00645089
NM_014454	0.981866	NM_029835	-0.147297
NM_006551	0.520624	NM_001081548	-0.904808
NM_000848	1.57985	NM_001037764,NM_009021	-0.155931
	0.235684	NM_011743	-0.411575
NM_006552	0.932169	NM_054078	-0.669705
NM_058173	-0.0146008	NM_018872	-0.856085
NM_004836	1.6782	NM_173437	-0.00247507
NM_000359	-1.99656	NM_008883	-0.887013
NM_014624	0.0384837		-3.51467
NM_152588	1.5449	NM_177780	0.210096
NM_173672	1.69253		-0.68703
NM_000102	-3.2092	NM_021604	-1.17563
NM_002100	0.369311	NM_001033420	0.436927
NM_002985	-0.400358	NM_016701	-0.471437
NM_005442	0.892991	NM_021450	-0.761139
	-0.071835	NM_011053	-0.0240575
NM_002983	0.550968	NM_178930	0.951216
	-2.46284	NM_001081183	-0.514169
NM_002984	0.307165	NM_198294	-0.337275
NM_001097589,NM_005416	-0.430528	NM_010864	-0.400907
	-1.28389	NM_031158	-0.107933
NM_006272	-0.0856575	NM_001080706	-1.20509
NM_018928,NM_032406	-0.766354	NM_001102430	-1.02098
NM_005031,NM_021902	0.297397	NM_176841	-0.586688
NM_052870	-0.634846	NM_134013	-0.0299116
NM_005621	0.209202	NM_001081177	0.369674
NM_032563	0.0317847	NM_001159521,NM_138749	1.79632
NM_152286	0.331593	NM_133199	-0.447343
NM_004679	-0.217445	NM_172381	0.11987
	1.21787	NM_015734	-0.0580538
NM_005750	0.80367	NM_008482	0.043691
NM_002990	0.825278	NM_027996	-0.104437
NM_002411	0.322777	NM_001029856	-1.29575
NM_004573	-0.0841642	NM_001081216	-0.991824
NM_019001	0.43168	NM_201600	0.0795343
NM_207430	1.5616	NM_010681	0.933742
NM_005572	0.14579	NM_009764	0.36343
NM_002964	0.62607	NM_144812	-0.00757409
NM_006072	0.0329983	NM_177124	-0.205782
NM_006271	0.374696	NM_011647	0.687189
NM_001005855	1.40844	NM_007729	-0.28307
NR_015363	0.386692	NM_001005608	0.581364
NM_005409	0.918463	NM_001042743	-0.234948
NR_024267	0.303383	NM_008483	-0.407838
NM_005217	-0.373931	NM_001081184	0.142774
NM_021010	0.187219	NM_001081378	-0.346838
NM_178434	-0.255372	NM_001085495	0.470062
NM_005400	1.23261	NM_011247	0.0375093
NM_000448	0.460972	NM_172749	0.146185
NM_031431	0.576196	NM_013589	-0.245727
NM_000951	-1.29538	NM_172579	0.18852
NM_002722	-0.197015		-1.57485
NM_002407	-1.69362	NM_001081028	0.783366
NM_138465	0.411307	NM_183046	-0.889768
NM_000276	1.0608	NM_207682	-0.176752
NR_026763	-0.630217	NM_001081068	-0.753665
NM_001682	1.49301	NM_001081256	-0.306434
	1.25632	NM_001085355	0.0350686
	0.192627	NM_198304	0.517532
NM_001097610,NM_145651	0.61984	NM_029510	0.119562
	0.611588	NM_009461	-1.30291
NM_015562	2.97647	NM_178242	1.3071
NM_001042519,NM_001042520,NM_001042521,NM_032321	0.324654	NM_146078	-0.434501
	-1.0219	NM_026298	-0.0493124
NM_001146157	-0.716201	NM_010617	0.263243
NM_172193	0.415522	NM_009386	-0.629449
NM_030962	1.27836	NM_177379	-0.168489
NM_002230,NM_021991	0.34695	NM_029888	-0.00705969
NM_001130082,NM_002673	0.585718	NM_016919	-0.482501
NM_130897	0.667144	NM_009780	-1.20721
NM_002866	0.528131	NM_001081091	-0.891324
NM_004329	1.58695	NM_001081154	-0.892478
	2.22418	NM_172924	-0.947532
NM_004591	0.590614	NM_027770	-1.29091
NM_032823	-1.3014	NM_026083	0.127257
NM_001032392	0.377376	NM_009297	0.446706
NM_002204	0.730046	NM_013825	-1.03568
NM_018284	0.786558	NM_011916	-0.629141
NM_006533	-1.32292	NM_001081337	0.665422
NM_001925	0.660776	NM_001081260	1.32201
NM_002986	-0.27288	NM_009088	-0.236826
NM_002299	-1.01578	NM_178029	0.0193542
NM_001039547	1.81128	NM_001122998,NM_011878	-0.0599878
NM_030964	0.673047	NM_010587	-0.142372
NM_005978	0.668966	NM_183016	0.243914
NM_012240	0.552499	NM_019919	0.0750798
NM_001126106,NM_003982	1.64533	NM_007690	-0.596257
NM_013453,NM_145662	0.212172	NM_001081355	-0.626051
NM_001012973	0.591447	NM_153395	0.0589654
NM_021619	-1.64652	NM_030168	-1.32591
NM_016195	0.971698	NM_009932	-0.206715
NM_000246	-0.106887	NM_175046	-0.428582
	1.06761	NM_001039581,NM_013855	0.483206
NM_005408	-0.584948	NM_001081251	-0.55867
NM_014715	1.49613	NM_020253	-0.343765
NM_153831	1.68967		0.26684
NM_032146,NM_177976	2.21319	NM_012026	-0.158769
NM_005554	0.163106	NM_201529	-1.30146
NM_007281	0.578029	NM_001123327	-1.17901
NM_001565	-0.215261	NM_178782	0.344795
NM_006274	-0.183757	NM_001081043	-0.175575
NM_000423	-0.816694	NM_053185	-0.213384
NM_020738	1.95372	NM_007736	-1.14133
NM_001010857	0.150736	NM_025611	-0.15984
	0.237626	NM_031185	-2.72482
NM_152663	2.22435	NM_026458	-1.31316
NM_005232	1.09285	NM_007735	-2.37364
NM_020770	1.05405	NM_001081118	0.121957
NM_006273	0.853014	NM_001081112	-0.0997718
NM_032230	0.333442	NM_010406	-0.584113
NM_018489	1.02787	NM_027375	-0.135373
NM_002982	0.526946	NM_001024917	0.0921621
NM_005623	0.573807		-1.90816
NM_000040	0.856698		-1.40129
NM_198521	-1.3666	NM_001003908	-0.234808
NM_016438	0.678404	NM_001077707	-1.34084
NM_198443	-2.27323	NM_001109040	0.331379
NM_198562	0.50779		0.0134517
NM_000584	0.203754	NM_009931	-0.685807
NM_005810	0.513428	NM_175641	0.112193
NM_178356	-0.235302	NM_134089	0.539814
NM_207392	0.206011	NM_009778	0.552006
NM_004405	0.675433	NM_011365	0.0166441
	0.0324387	NM_016721	-0.740875
NM_000638	-0.509723	NM_001159948,NM_028717,NM_146109	0.447402
NM_016084	0.249784	NM_009926	-0.279897
NM_001004469	-1.47838	NM_013719	-0.203964
	-0.0660691	NM_175472	-0.604897
NM_001080391	0.887363	NM_001081214	0.109166
	-2.82554	NM_147219	-0.266053
NM_174891	1.13154	NM_001017426	-1.00931
NM_001039360	0.732963	NM_175251	-1.01682
	-0.433746	NM_172274	-0.289781
NM_001926	0.360799	NM_001033484	-0.274648
NM_003018	-0.0791532	NM_010066	0.481324
NM_017744	0.503549	NM_001081258	-0.505984
NM_007163	0.390955	NM_021362	0.112238
NM_152278	0.0397874	NM_145997	-0.617747
NM_003633	1.27149	NM_001003911	0.234085
NM_001643	0.491214	NM_008513	-0.196317
NM_145657	-0.00457249	NM_011417	0.585491
NM_000591,NM_001040021	-0.354284	NM_008514	-0.518369
NM_183377	0.0265842	NM_009409	0.662104
NM_001105576	0.187118	NM_001081022	0.115797
NM_002619	0.286337	NM_001110131,NM_001110132,NM_027882	-0.201352
NM_176823	0.136151	NM_010683	-0.909575
NM_000805	0.0355667	NM_001029934	0.143953
NM_016206	-0.256845	NM_175258	-0.429009
NM_001011655	0.428719	NM_001081413	0.27991
NM_002960	0.0737178	NM_145941	0.913939
NM_015547	-0.240774	NM_175501	0.0299239
NM_002963	0.672128	NM_172681	0.633648
NM_002847	0.0554747	NM_011948	0.422561
NM_144659	0.736909	NM_001033422	-0.868639
NM_001097611	0.329609	NM_022656	-0.453231
NM_001007538	1.68121	NM_009384	-0.557771
	0.192119	NM_009826	-0.271759
	0.18178	NM_011510	1.16669
NM_001017920	1.39413	NM_030180	0.42348
NM_001668	0.999771	NM_001099637	-0.375251
NM_002762	0.284421	NM_173390	0.841992
NM_016633	-0.108837	NM_011416	-0.0329776
NM_002075	-0.539433	NM_008130	-0.158107
NM_000917	1.33801	NM_174991	0.445287
NM_001037126	-0.0880899	NM_001115076	-0.0718913
NM_019891	1.68117	NM_028029	0.780802
NM_015186	1.13778	NM_028266	0.62137
	0.698676	NM_010156	0.274552
NM_206898	1.14198	NM_172703	0.471752
	0.760673		-0.315156
NM_183239	1.52855	NM_001159361	-0.269821
NM_014701	1.73769	NM_001024602	1.07117
NM_000900	-0.656622	NM_016705	-0.475053
NM_020125	1.36054	NM_001081419	0.393721
NM_153809	0.780665	NM_008817,NR_023846	-0.489719
NM_018071	0.467465	NM_177472	-0.312896
NM_018303	1.9379	NM_001013414	-0.726595
NM_016512	-0.236356	NM_013634	-0.40618
NM_024320	0.266667	NM_026574	-0.341973
NM_032411	0.535853	NM_001085492	-0.107587
NM_005472	0.816156	NM_145527	0.229577
NM_003738	0.291475	NM_001081426	-0.258131
NM_145326	1.11842	NM_013815	-0.651325
NM_182765	0.797776	NM_001003912	0.44137
NM_022742	1.37566	NM_001099297	-0.0427401
NM_153607	0.481195	NM_001029985	-1.14159
NM_001832	0.603152	NM_001114399	-0.471857
NM_138378	1.06434	NM_001103181,NM_054040	-0.308608
NM_139174	-0.297433	NM_152895	-0.47083
NM_003586	0.719425	NM_027144	0.300763
NM_144579	0.361575	NM_199322	-0.401785
NM_015714	1.1815	NM_001081276	-0.39943
NM_080388	0.285324	NM_053099	-0.543995
NM_007315	1.23624	NM_001081326	-0.325068
NM_198993	0.320982	NM_015748	-0.673398
NM_020939	0.467076	NM_001025426	-0.870394
	1.38508	NM_173392	-1.83829
NM_004479	-0.548337	NM_011623	-0.059727
NM_002620	0.393332	NM_008576	0.338012
NR_026814	-2.10895	NM_198899	0.586563
NM_052863	-0.123912	NM_001029876	-0.0557412
NM_001130528	1.03934	NM_001037709,NM_199057	0.492493
	1.20416	NM_011412	0.875477
NM_000804	0.136984	NM_029600	-0.472759
NM_001008493	1.70426	NM_026866	-0.0129499
NM_020672	0.00713147	NM_178804	-1.00533
NM_152559	0.215078	NM_026054	-1.03555
	-0.264938	NM_198249	-0.0566528
NM_001143919,NM_181657	-0.719427	NM_176979	0.0786885
NM_032414	0.188663	NM_001039939	-0.0747942
NM_005620	0.383004	NM_029735	0.172876
NM_173499	0.807729	NM_001081058	-1.38445
NM_080429	-2.3086	NM_175751	-0.378581
NM_031964	-0.290834	NM_013668	0.358966
NM_199280	0.0089801	NM_201407	0.091222
NM_006219	1.7028	NM_009728	-0.179179
NM_001029888	-1.04159	NM_026604	-0.431576
NM_207581	0.195886	NM_001015507	-0.22142
NM_152304	-0.0648406	NM_178113	-0.271582
	0.121317	NM_011941	-0.429216
NM_022161	-0.463452	NM_009706	-1.53992
NM_004393	1.10346	NM_172558	0.792261
NM_032184	1.9161	NM_172739	0.752249
NM_152564	0.800066	NM_007737	0.939251
NM_020909	1.14784	NM_177658	-0.050188
NM_147189	0.629537	NM_030256	0.730809
NM_015902	1.2899	NM_011945	-0.579605
NM_020130	0.270654	NM_008684	0.138741
NM_005769	0.935443	NM_026763	-0.289867
NM_004864	-0.580357	NM_001109757,NM_009726	-0.759703
NM_001024807,NM_005166	0.864766	NM_001014981	-0.477443
	0.224556	NM_001081298	-0.0501666
NM_031413	0.42084	NM_031163	-0.214017
	0.891084	NM_008867	-1.15329
NM_006181	-0.376392	NM_018823	-0.660295
NM_002089	-1.04172	NM_172661	0.582069
NM_007261	0.940567	NM_153164,NM_178078	-0.479375
NM_000655	1.48338	NM_001109626	-0.19551
NM_001130480,NM_006296	2.1733	NM_008171	-0.788079
NM_203451	-0.940273	NM_009702	-0.400198
NM_152475	0.521838	NM_001081291	0.249303
NM_006983	-0.691101	NM_011714	0.0601492
NM_012113	0.149428	NM_008626	-0.505511
NM_183416	1.95327	NM_001081360	-0.355363
NM_031469	0.354289	NM_021050	-0.830103
NM_001085429	0.254426	NM_181395	-0.228742
NM_014965	0.456895	NM_001040459	-0.114829
NM_001395	0.82293	NM_153538	-0.0770662
NM_002185	1.43047	NM_001081109	-0.206044
NM_001381	0.346264	NM_181039	1.18235
NM_172374	0.787962	NM_001029850	0.895325
NM_001030002,NM_005310	-0.33664	NM_001145921,NM_001145922	0.257216
NM_001012337	2.62588	NM_001081293	-1.06181
NM_005421	0.550527	NM_010230	-0.73836
NM_178502	-0.473629	NM_008892	-0.405031
NM_032557	1.87007	NM_024281	-0.0945951
NM_002112	1.02418	NM_134126	0.056114
NM_001001552	0.46751	NM_009930	0.483366
NM_001001786	0.692592	NM_008664	0.261782
	1.09305	NM_008678	-0.65973
	1.29865	NM_007511	-0.887125
NM_001958	0.967142	NM_175749	-1.27057
NM_003709	0.116814	NM_001033536	-1.03322
NM_006419	0.204381	NM_001048208,NM_012005	-0.295655
NM_019845	0.267186	NM_133957	-0.698844
NM_145352	-0.553514	NM_008983	0.0552117
NM_017493	0.515657	NM_029166	-0.208008
NM_002854	0.232657	NM_028148	0.965427
	0.405286	NM_028481	-3.07919
NM_001012241	0.676168	NM_007742	0.452398
NM_030934	1.72568	NM_010918	-2.285
NM_053283	-0.315795		-1.28902
NM_173552	1.97788	NM_001033244	-0.270231
NM_032309	0.473855	NM_001005868	-0.49434
NM_003734	-0.595382	NM_001126182,NM_010872	-0.490743
NM_198461	1.63508	NM_008146	0.428427
NM_001159547,NM_207406	1.37824	NM_175310	-1.58902
NM_014357	0.468811	NM_011214	-0.623026
NM_178429	-0.265426	NM_008981	-0.0211773
NM_022045	0.369213	NM_153098	0.231647
NM_001885	-1.36853	NM_001081267	-0.611847
NM_001380	0.0134172	NM_028385	-0.69094
NM_152445	0.894655	NM_053193	0.981236
NM_001079538,NM_130777	0.154568	NM_001040111	0.0604905
NM_006226	1.63157	NM_001083587	0.623736
NM_032579	-0.405082	NM_016925	-0.0495535
NM_000539	0.428964	NM_001081269	-1.10388
NM_001012978,NM_001159560	2.14762	NM_001110253,NM_148925	0.497987
NM_004887	0.121918	NM_025709	-0.209362
NM_130776,NM_133179	1.94548		-0.258788
NM_174881	0.296965	NM_013790	-1.15356
NM_001627	1.02248	NM_178795	0.722232
NM_012223	1.61428	NM_008957	0.0894299
NM_004505	1.40338	NM_172963	0.749023
NM_152727	0.864281	NM_001080769	0.538029
NM_014895	1.12365	NM_001081366	0.432171
NM_152309	-1.01925	NM_009730	-0.555207
NM_020061	0.0313138	NM_009986	-0.475681
NM_053043	0.195925		-0.240509
NM_018728	1.27146	NM_020260	0.145517
NM_144985	0.623264	NM_029933	-0.0076791
NM_007102	-0.00679931	NM_153424	0.264067
NM_001040649	-1.8461	NM_009483	-0.693626
NM_152594	2.40289	NM_001081057	-0.40571
NM_020447	-0.563497	NM_177710	-0.34929
NM_031953	1.71707	NM_001081319	-0.468257
NM_001004439	-0.868176	NM_001081152	-0.959819
NM_022840	0.970275	NM_177868	-1.66591
NM_174892	0.705212	NM_001002764	-1.10033
NM_012118	0.987399	NM_001042527,NM_007550	-0.84054
NM_024872	-0.502318	NM_028283	0.575148
NM_020133	0.879539	NM_175337	0.314959
NM_032433	0.225187	NM_001001932	-0.31301
NM_058203	-0.387973	NM_177294	-0.034654
NM_170685	-0.264153	NM_172683	-0.442603
NM_145207	0.217733	NM_010881	-0.206468
NM_004167,NM_032964,NM_032965	0.798773	NM_001045514	-0.504333
NM_001146319,NM_001146320,NM_001146322,NM_023927	1.08627	NM_020568	0.050315
NM_148894	1.90709	NM_008695	-0.436719
	-2.92629	NM_010870	-0.545173
NM_001017978	0.323471	NM_172463	-0.211132
	-1.06659	NM_008679	0.373059
	0.503468	NM_199316	-0.719347
	1.09082	NM_021512	-0.617678
NM_022055	0.0513171	NM_001122822,NM_011721	-0.587679
NM_002993	0.293311	NM_153533	0.696102
NM_014632	0.669924	NM_020508	-0.878736
NM_002418	0.338538	NM_053072	-0.710824
NM_153348	1.09951	NM_001081341	-1.13088
NM_002994	0.730364	NM_175275	-0.744573
NM_019841	-0.890313		0.0607599
NM_002443	0.0789366	NM_207204	-0.564096
NM_058237	1.65751	NM_001113353	0.769218
NM_002995	0.609811	NM_146171	0.339954
NM_003175	0.41043	NM_028233	-0.143279
NM_002965	0.35188	NM_133227	-1.17166
NM_012340	1.88217	NM_001081203	-0.517916
NM_005764	-0.238104	NM_019765	0.177191
NM_006343	0.971945	NM_001081247	-0.0443514
NM_001079527	0.157527	NM_181594	0.858035
NM_001098725,NM_021966	-1.04442	NM_009072	-0.593204
	1.40775	NM_010620	-0.390805
NM_015054	1.91682	NM_016782	-0.74326
NM_005519	0.482486	NM_007842	-0.358124
NM_021035	0.460733		-0.823014
	0.744042	NM_080850	0.622272
NM_005704	1.26724	NM_001033759,NM_031997	0.461092
NM_004755	1.15203	NM_173402	0.646893
NM_004283	1.37708	NM_008591	-0.522545
NM_000433	0.0470918	NM_181415	-0.805808
NM_000315	0.244726	NM_007754	0.116264
NM_003593	0.636999	NM_029498	0.0255574
	0.237994	NM_001081232	-0.773314
NM_005838	0.368549		-3.95586
NM_207333	1.38169	NM_026825	0.353486
	0.172618	NM_001130149,NM_026799	0.553068
NM_001039792	0.435153	NM_007743	0.75235
NM_001017991	0.284233	NM_153537	0.842294
NM_001002811	0.339401	NM_173008	-0.116961
NM_033553	0.287357	NM_172421	-1.1071
	1.07544	NM_019831	0.644948
	0.392078	NM_010513	0.360072
NM_030572	1.0198	NM_027347	-0.787219
NM_138706	0.154522	NM_001081102	0.302052
NM_001048	0.856645		-0.637195
NM_004291	0.523706	NM_172594	0.769378
NM_002048	1.49399	NM_027435	-1.41721
NM_033631	0.902105	NM_172536	0.675645
NM_138362	0.615744	NM_030728	0.707978
NM_001127257,NM_020342	1.86486	NM_027804	0.384844
NM_003868	0.926772	NM_181404	-0.282159
NM_012121	0.653074	NM_028014	0.437049
NM_033106	-0.00447245	NM_010830	0.415745
NM_181077	-0.711904	NM_001081309	0.188621
NM_030663	0.594956	NM_133758	0.0780497
NM_000735	0.572079	NM_001081423	-0.450204
NM_001025290	-0.0858913	NM_009071	0.395397
NM_002428	1.33047	NM_001033237	-0.492967
NM_014608	1.51058	NM_009624	-0.0369387
NM_004851	-0.300939	NM_001003955	-0.0460016
NM_033647	1.71549	NM_001081158	-0.484575
NM_003759	1.77836	NM_001081282	-0.195112
NM_020647	1.08815	NM_146251	0.4251
NM_002638	-0.116409	NM_008982	-1.16922
NM_001017403	1.03806	NM_183426	0.0108604
NM_001134435,NM_032263	1.44024	NM_001004359,NM_001005385,NM_026081	0.153961
NM_005862	1.41052	NM_172751	0.789026
NM_144645	0.493127	NM_010123	-0.739366
NM_145285	0.639797	NM_016776	0.965137
NM_005059	0.00247587	NM_001014996	-0.758059
NM_016362,NR_024132,NR_024137	-0.499338	NM_001045964	1.22268
NM_181502	0.810255	NM_153804	0.407008
NM_012274	0.56196	NM_001083912,NM_138752	0.990843
NM_213608	0.696606	NM_010153	0.0974602
NM_178463	0.344176	NM_001085473,NM_023190,NR_024029	-0.185317
NM_001496	0.485979	NM_001159519	-0.857401
NM_007224	0.218539	NM_199027	-0.0198677
NM_139355	0.245386	NM_013931	-1.20141
NM_170683	0.0985046	NM_011723	0.133154
NM_130772	0.834028	NM_028898	-0.831514
NM_002569	1.41003	NM_198942	-0.544075
NM_182925	0.207556	NM_026585	0.0124007
	1.68474		-0.00124373
NM_001099777	0.315733	NM_009676	-0.84111
NM_005867	0.279584	NM_026079	0.552402
	0.367114	NM_001135559	-1.64315
NM_001005377	0.348756	NM_001081373	0.660512
NM_005143	0.394546	NM_001081321	-0.917578
NM_181526	0.192419	NM_023879	-0.428709
NM_001160210,NM_014251	0.421065	NM_028866	0.233622
NM_178543	-0.931349	NM_145946	0.366644
NM_001134650,NM_173359	0.336765	NM_054044	1.07881
NM_006193	-0.398449	NM_015801	0.13013
NM_001134649	0.74842	NM_008477	-0.886937
NM_147196	0.424521	NM_172339	-0.626251
NM_003151	0.475043	NM_001033336	-0.773558
NM_152533	0.495673	NM_028721,NM_172460	0.0322589
NM_133486	1.33251	NM_029749	0.0654273
NM_145236	0.0254949	NM_008172	-0.35014
NR_026857	1.82628	NM_001001884	-0.235064
NR_024406	-0.24427	NM_021390	-0.763236
NM_001005404	1.1751	NM_001038695,NM_173001	-0.744657
NM_003268	1.04814	NM_175091	-0.0244526
NM_001012452	-0.658879	NM_001122594	-0.361244
NM_198477	-0.142975	NM_001081963	0.0513211
NM_178433	0.316491	NM_032543	0.0261871
NM_000024	-0.865022	NM_011552	0.927197
NM_005236	0.627984	NM_033620	0.226601
NM_199346	-0.221102	NM_009231	-0.425985
NM_198152	0.346916	NM_177185	-1.28816
NM_014695	-0.248657	NM_175031	-0.532419
NM_002515	0.745889	NM_175554	0.073527
NM_004624	0.655568	NM_001109991,NM_009929	1.12259
NM_001965	0.449343	NM_001047604	-0.375052
NM_002700	0.325017	NM_194262	-0.999747
NM_001144952	0.53104	NM_009012	0.395979
NM_004590	0.236671	NM_001081133	-0.59034
NM_052995	0.266022	NM_145492,NM_181326	-0.261095
NM_000536	0.283011	NM_027498	-0.873967
NM_152778	0.387382	NM_001003953	0.248087
NM_018167	0.0208539	NM_001097621	1.22656
NM_020650	-0.0419064	NM_027569	-0.197927
	0.0274435	NM_018877	-0.25361
NM_020958	0.176748	NM_019426	-0.145498
NM_014343	-0.0171628	NM_178252	-1.25277
NM_021920	-0.0280615	NM_153569	0.175771
NM_001033677	1.30714	NM_031179	-0.230065
NM_000412	-0.423431	NM_001077425	-0.623108
NM_198504	0.881587	NM_198631	0.294042
NM_024563	-0.55274	NM_177589	0.188203
NM_015627	0.73634	NM_021280	0.253583
	0.610606	NM_172669	0.923852
NM_001553	1.87029	NM_026599	-0.259521
NM_032514	0.228741	NM_172766	0.151702
NM_024426	0.693273	NM_001012518,NM_172545	-0.197164
NM_170601	1.54011	NM_199447	0.253003
NM_001145873,NM_001768	0.43224	NM_026856	-1.64889
	-0.112243	NM_001159367,NM_011065	0.417636
	0.966561	NM_001110212,NM_146112	0.088264
NM_030754	0.432071	NM_016693	0.681739
NM_025031	0.328187	NM_173444	-1.83478
NM_015549	-0.114824	NM_027830	0.160583
NM_024562	0.981155		0.554438
NM_031899	0.288589	NM_172628	0.100765
NM_178829	0.195795	NM_153122	0.673521
NM_014157	0.317171	NM_026605	0.51553
	0.0309511	NM_198037	-0.782119
	0.350352	NM_173755	0.555001
	-0.0292643	NM_001081960,NM_001114347,NM_029633	-0.112692
NM_174943	-0.743011	NM_021494	-0.712896
NM_002284	0.404602	NM_133786	-1.18756
NR_027257	-0.0380431	NM_009125	0.228659
	0.183396	NM_177644	0.0240301
NM_006188	-1.44152	NM_020608	-0.435048
NM_033084	-1.05806	NM_194339	0.849134
NM_000790,NM_001082971	-2.83651	NM_153391	-0.925228
NM_015973	0.58422	NM_032000	-1.79571
NM_080659	-0.0389411	NM_011256	0.242091
NM_031275	1.03626	NM_007835	1.2106
NM_172201	-0.481663	NM_028887	-0.694183
NM_005672	0.275612	NM_008720	0.0542574
NM_006904	2.36064	NM_021493	0.488874
NM_007223	-0.463508	NM_008830	-1.07896
NM_014963	0.642507	NM_011075	-0.608049
	0.300334	NM_001001144,NM_001103162	0.868554
NM_001010982,NM_001145526	0.953089	NM_172415	0.37014
NM_003121	-0.871552	NM_001081066	-0.755035
NM_023107,NM_023108	1.20801	NM_001110351,NM_011378	0.537278
	0.73727	NM_022009	0.834898
NM_048368	1.00018	NM_198411	0.677856
NR_027379	0.412224	NM_001081412	0.629385
NM_013385	0.588581	NM_001081132	-0.980858
NM_001039477	-0.785506	NM_144920	-1.67813
	1.20846	NM_133808	0.412606
NM_182574	0.403689	NM_001145978	0.175254
NM_002607	1.66573	NM_172525	-0.492077
	0.348738	NM_172280	-0.289265
NM_005490	0.751919	NM_173431	-0.606147
NM_001031623	0.928339	NM_145830	0.771893
NM_133498	0.763276	NM_011690	0.702992
NM_017723	0.831837	NM_009185	0.010987
NM_207429	0.189859	NM_001039546	-0.826656
NR_024413	0.868541	NM_172015	0.168935
	0.28819	NM_009418	-0.651557
NM_007077	1.42922	NM_001081195	-0.106227
NM_176096	0.206795	NM_008478	-0.468348
NM_031296	0.524629	NM_198248	-0.496432
NM_030650	1.84418	NM_001122739,NM_010567	0.767402
NM_000390	1.05638	NM_011066	-0.833522
NM_014698	1.24104	NM_019459	-0.529838
NM_194292	0.751679	NM_001003817	0.899714
NM_016602	-0.831776	NM_001008422	1.50839
NM_182569	1.19674	NM_007858	0.160729
NM_003745	-0.373219	NM_011370	0.314867
NM_002416	-0.0137507	NM_008520	0.511771
NM_012390	0.712117	NM_001081128	0.228331
NM_001083914,NM_001329	-0.970073	NM_027171	0.376492
NM_212503	0.167788	NM_080558	-0.749616
NM_005860	-0.04449	NM_207209	-0.247242
NM_003277	-0.717195	NM_021339	0.169438
NM_182560	-0.206477	NM_001042558,NM_009684	-0.242184
	-0.745601	NM_019570	-1.82438
NM_020856	1.31836	NM_153412	-1.06854
NM_148896	0.543532	NM_177462	-0.507558
NM_205545	0.181344		0.121626
NM_006951	1.53936	NM_029745	1.38858
NM_022132	2.50207	NM_030178	0.689182
NM_153337	-0.490473	NM_010917	-1.41783
NM_001037288	-0.791375	NM_027777	-0.631839
NM_001123228	0.590121	NM_144831	-0.154475
NM_000579,NM_001100168	0.301047	NM_021337	0.661298
NM_139278	0.315901	NM_001081278	0.297089
NM_012330	2.01888	NM_001136078,NM_008851	0.623905
	-0.106044	NM_001024856,NM_001024857	-0.720141
NM_001347	-0.132157	NM_146235	-0.352792
NM_003821	-0.42869	NM_182716	-0.802566
NM_024409	0.284731	NM_177025	-0.438677
NM_002981	0.559306	NM_026891	-0.863085
NM_014639	1.38606	NM_175556	-0.147426
NM_022735	2.39201	NM_030074	0.749342
NM_001042692,NM_015910	1.0912	NM_001081377	-0.807262
NM_152435	-0.0525832	NM_009207	1.36421
NM_138294	-0.155221	NM_001004164	-0.195469
NM_032167	0.441048	NM_025958	-2.98341
NM_032832	2.13537	NM_172783	0.0157682
NM_001613	0.612857	NM_008874	0.703988
NM_001013717	0.821099	NM_008696	0.0712033
NM_014423	1.63615	NM_021878	-0.967319
NM_004533	0.396218	NM_001081353,NM_001145676	-0.940602
NM_001105519	0.216466	NM_009938	0.22294
NM_018190,NM_176824	0.928399	NM_019710	-0.4296
NM_001145427	0.898842	NM_009289	0.202518
NM_005540	0.995904	NM_008446	-0.0727129
NM_005609	-2.26867	NM_010570	-0.765253
NM_145305	-0.625312	NM_001030306	-1.25953
NM_022065	0.90043	NM_001077712,NM_021465	-0.678405
NM_175885	-0.134511		-0.463578
NM_152479	-0.210758	NM_175155	-0.37801
	0.326592	NM_027994	-0.147141
NM_001042681,NM_012102	0.338918	NM_010678	-0.701426
NM_020947	1.33673	NM_178380	0.73067
NM_003280	-1.07227		-0.717919
NM_032206	0.567418	NM_001039087	-0.167483
NM_015554	1.46094	NM_001145896,NM_001145897,NM_198671	-0.177627
NM_020429	0.909804	NM_001081241	1.1585
NM_170610	0.512873	NM_172255	-0.420037
NM_001443	0.475063	NM_175638	-0.0562452
NM_152554	0.502875	NM_009282	-0.608412
NM_014021	1.70861	NM_007992	0.482242
NM_152319	-0.569414	NM_026482	-0.824297
	0.298149	NM_145920	0.883581
NM_004737,NM_133642	-0.141397	NM_173443	-0.261673
NM_000481	-0.44531		-0.232531
	0.316517	NM_001128094,NM_001128096	-0.259177
NM_173201	0.197987	NM_023328	0.0574911
NM_019846,NM_148672	0.4319	NM_013822	-0.404835
NM_016358	0.0555882	NM_133919	-0.633429
NM_000523	0.558492	NM_178707	-0.125463
NM_003087	-0.110096	NM_007790	0.238627
	0.193068	NM_010113	-1.44368
NM_024894	1.74693	NM_133347	1.1204
NM_020685	0.701761	NM_133953	-0.100519
NM_003047	-0.854532	NM_017462	0.447377
NM_020157	-0.50462	NM_198303	0.563015
NM_002389	1.65868	NM_058214	-0.654918
NM_002704	-1.02865	NM_010572	0.943036
NM_020704	0.433	NM_030207	-1.1929
NM_003695	0.463003	NM_001045528	0.274478
NM_020870	2.2769	NM_173187	-0.211452
NM_017442	0.530045	NM_001145830	0.256598
NM_178859	0.445211	NM_011523	0.295456
NM_004918,NM_199206	1.29654	NM_015753	-1.23737
NM_145272	-0.881255	NM_153057	0.89587
NM_000363	0.426491	NM_001081182	-0.298708
	-0.310658	NM_175643	0.707084
NM_145200	-0.348235	NM_175130	0.566288
	0.219825	NM_025852	0.377089
	-0.276339	NM_183091	-0.125408
NM_020774	2.40638	NM_001013256,NM_001143790,NR_026565	0.246697
NM_004209	0.558539	NM_207655	-1.2405
NR_026882	0.0504385	NM_010432	-0.471358
NM_138360	0.283186	NM_001005863	-0.284994
NM_020971	0.0332105	NM_178923	0.3179
NM_130769	0.0559848	NM_001001882	0.316545
NM_005423	0.364601	NM_134087	0.410017
NM_003262	1.67324	NM_018793	0.753847
NM_032021	1.5882	NM_172551	0.353817
NM_031435	1.64492	NM_001081316	-0.295013
NM_207328	-0.977039	NM_173182	-1.00225
NM_003182	0.643851	NM_153078	-0.921552
NM_001146154,NM_001146155,NM_152444	2.12598	NM_001081127	-1.14619
NM_000229	-0.766276	NM_009194	-0.422641
NM_002520	0.998577	NM_001122603	-0.0211384
NM_178520	0.14169	NM_172622	0.515645
NM_175913	0.139992	NM_001081315	-0.51953
NM_015542,NM_080599	0.630206		-1.86587
NM_207413	0.365701	NM_028198	-0.290966
	0.419908	NM_001110017	-1.16667
NM_014820	2.34284	NM_175089	-0.383166
	1.8972	NM_001081050	-0.519563
NM_004160	-0.0210366	NM_008713	0.0634596
NM_003621	0.758751	NM_080643	-1.3043
NM_001018113,NM_152633	-0.657124	NM_133992	-0.626564
NM_030648	2.35113	NM_133224	-0.0859037
NM_004158	0.504497	NM_001004436	-0.329529
NM_006512	0.404875	NM_148932	0.040374
NM_014278	1.88119	NM_007460	0.600946
NM_138287	0.654035	NM_001081288	0.209221
NM_003226	0.280668	NM_207636	-0.440027
NM_000081	0.26635	NM_027421	-1.09126
NM_178497	0.591765	NM_183106	-0.560703
NM_173667	0.447824	NM_177699	-0.461805
NM_024646	1.71316	NM_026493	-0.182346
NM_002269	0.646317	NM_175537	-0.309961
NM_177437	0.00840656	NM_011589	0.709969
NM_015488	1.3555	NM_029878	0.776006
NM_152399	-0.307741		0.417418
NM_004536	0.207887	NM_134136	-0.310861
	1.01557	NM_029741	-0.625919
NM_001113402,NR_004854	-0.311504	NM_008485	0.614365
NM_199138	-0.471165	NM_001014974	-0.332457
NM_017451	-1.37983	NM_175430	-0.868431
NM_018227	0.919844	NM_010434	-0.511049
NM_017488	1.46075	NM_175485	-1.0676
NM_025216	0.0777016	NM_008017	-0.302286
NM_001143833	0.312415	NM_028234	-1.1342
	0.338859	NM_026361	-0.413581
NM_030628	0.859835	NM_133215	0.933784
NM_020311	0.395419	NM_008976	0.566458
NM_012472	0.234805	NM_001159603,NM_001159604,NM_030722	-1.48841
NM_005865	0.419259	NM_010433	-0.341549
	-0.394345	NM_023598	-1.18952
	1.73391	NM_133791	0.11717
NM_005543	0.0879683	NM_022979	-0.274314
NM_001001561	-3.3247	NM_015804	-0.198395
NM_001042481,NM_152330	0.734155	NM_001100591	-1.79393
NM_023946	-0.603298	NM_001081192	0.125177
	1.79016	NM_001033263	0.474652
	0.277529	NM_145432	-0.232144
NM_005167	1.42275	NM_031177	0.460432
NM_004402	1.41747	NM_177852	-3.26184
NM_006498	0.185956	NM_009595	-0.249662
	1.004	NM_001081333	-1.35456
NM_003898	1.30654	NM_172470	-0.166258
NM_002677	0.626928		-1.51152
NM_001442	0.259837	NM_029432	-0.026556
NM_000134	0.889818	NM_001033228	-0.550562
	0.460843	NM_172911	-0.347145
NM_001138,NM_007316	-0.452996	NM_008797	0.0116056
NM_001109659,NM_001109660	0.551641	NM_134137	0.702711
NM_198447	0.540656	NM_026327	-1.45262
NM_016174	1.66465	NM_178404	-0.966366
NM_003064	0.515688	NM_001146199,NM_011877	0.49346
NM_053282	0.378599	NM_009149	0.759582
NM_001446	0.856878	NM_029570	-1.05509
NM_152544	0.630912	NM_001033268	-0.793457
	-0.958851	NM_007881	0.485942
	0.195863	NM_013829	-0.397581
NM_012120	2.37931	NM_178076	-0.841609
	0.630445	NM_153798	0.904484
NM_012186	0.204969	NM_178309	-0.888617
NM_003597	0.789077	NM_009431	-0.6986
NM_005598	0.221345	NM_001033375	-0.843335
NM_021089	0.233661	NM_019677	-0.0821732
NM_178120	0.681264	NM_172571	-0.0372348
	-0.12765	NM_022022	0.524786
NM_001013442	0.38993	NM_183155	0.936632
	0.576994	NM_019670	-0.52189
NM_001478	0.953439	NM_011581	0.34643
NM_004102	0.375067	NM_011580	0.0186022
NM_003972	0.897065	NM_010367	1.07918
	0.510587	NM_011729	-0.0292902
	0.414713	NM_029097	1.65837
NM_201575	1.13347	NM_181412	-1.52067
NM_006355	0.961053	NM_007405	0.237681
NM_000879	0.256212	NM_008399	-0.528928
NM_004164	0.836881	NM_011597	0.688817
NM_013302	1.13519	NM_001080813	0.570734
NM_001996	1.22733	NM_027410	0.832437
NM_052960	0.44878	NM_001081350	-0.267854
NM_006651	0.466117	NM_017407	-0.99586
NM_001080468	0.172046	NM_173753	-1.54287
NM_198229	0.616878	NM_001081012	-0.896227
NM_145239	-1.48649	NM_175028	0.154778
NM_001101376	0.430164	NM_199007	-0.264685
NR_026844	4.07196	NM_001081225	-1.59058
	2.2179	NM_013569	0.118143
NM_001304	2.14982	NM_019636	0.854382
NM_002521	-0.0497065	NM_194054	1.54793
NM_024887	0.986491	NM_146150	0.656144
NM_145040	-0.253974	NM_001001984	0.609169
NM_006988	0.790434	NM_173440	-0.758801
NM_031491	0.189514	NM_033565	-0.627936
NM_001037165	1.62893	NM_022887	-0.117627
NM_006334	0.495611	NM_153548	0.310749
NM_198514	1.13485	NM_028860	0.923551
NM_005478	0.573931	NM_183033	-0.534624
NM_017617	1.46274	NM_001081336	0.955869
NM_030649	0.928603	NM_020263	-0.772759
NM_024554	1.66214	NM_172288	0.329695
NM_002457	0.652247	NM_001122675	-0.191464
NM_145278	0.707014	NM_057171	0.194779
NM_183404	0.539354	NM_146145	0.129505
NM_001111061,NM_005599	0.857749	NM_019655	1.09263
NM_002899	0.333741	NM_139236	0.511656
NM_152909	0.307918	NM_172903	0.725229
NM_003128	1.17682	NM_011766	-1.08712
NM_025235	2.1551	NM_020506	-3.45003
NM_022834	0.901326	NM_133649	-0.594443
NM_052813	-2.46758	NM_008441	-0.296795
NM_020177	0.788563	NM_203319	0.955863
NM_015247	1.93949	NM_008549	-1.16043
NM_018659	1.79023	NM_181413	0.427143
NM_016607,NM_177947,NM_177948	1.34474	NM_001033301	0.704494
NM_001042507	0.329967	NM_001130416,NM_010413	0.31948
NM_080680	-1.1244		1.82066
NM_020131	0.922443	NM_015803	-0.849594
NM_152465	0.173857	NM_144789	-0.756362
NM_145316	0.499254	NM_001001979	-1.49389
	0.907817	NM_001033222	-0.385245
NM_178176	-0.326008	NM_026201	0.264631
NM_002264,NR_026698	1.50557	NM_001033291	-0.0362054
NM_000549	0.0411216	NM_027883	-0.0480813
NM_198317	-0.317817	NM_015735	1.44047
NM_018461	-0.0676759	NM_053170	-0.823217
NM_014329	1.03884	NM_199032	-0.262751
NM_007110	0.100185	NM_180662	1.20161
NM_033309	0.551446	NM_080708	-0.595217
	0.223827	NM_001013026	0.764748
NM_018231	0.626097	NM_133762	-0.973665
NM_017578	2.19185	NM_194341	0.477984
NM_001006622	1.21081	NM_011250	0.60309
	0.833077	NM_181750	-0.529414
NM_020932	0.479415	NM_026666	0.48284
NM_032341	3.46233	NM_015805	-0.43382
NM_001042729,NM_001042747,NM_005248	0.0399847	NM_009086	0.303145
	0.741169	NM_011480	0.157256
NM_005064,NM_145898	0.545481	NM_130448	-0.165845
NM_020337	2.02783	NM_001005507	-0.325869
NM_020817	0.596991	NM_001001326	-0.301586
NM_013378	-0.535273	NM_177240	0.273844
NM_181623	0.549543	NM_027423	-0.0330876
NM_001040708	-0.131898	NM_026872	-0.46685
NM_181701	0.926803	NM_146003	-0.420437
NM_005670	1.50319	NM_178641	0.0388475
NM_001029886	0.186461	NM_146258	-0.272901
	1.19401	NM_001048177,NM_008413	-0.634152
NM_004947	0.585018	NM_175179	-0.0237757
NM_178456	-0.116406	NM_011258	0.223764
NM_006832	1.38611	NM_001033270	-2.03038
NM_153756	-1.12769	NM_033218	0.860665
NM_017970	1.12068	NM_172806	-1.33355
NM_001042555,NM_006654	-0.0100724	NM_010690	-1.3091
NR_022006	0.714511	NM_001037863	-0.552344
NM_004454	2.34667	NM_173378	0.0672898
NM_030784	0.071817	NM_016965	-0.251517
NM_033277	0.153473	NM_198292	-0.0231829
NM_004936	-2.56144	NM_009636	0.803501
	-0.187418	NM_001159672,NM_175317	-1.35775
	0.0703542	NM_001005247,NM_001005248	-0.691618
NM_152994	0.839548	NM_133853	0.6547
NM_005425	0.651308	NM_028816	1.49859
NM_182558	-0.158747	NM_008633	0.826981
	0.406616	NM_031392	0.652836
	1.75822	NM_001122829,NM_030680	0.539118
NM_178569	-0.0495036	NM_008018	-0.300917
NM_002256	0.303349	NM_029231	1.25338
NM_001878	-0.104439	NM_009594	0.501633
NM_053034	1.80695	NM_173760	-0.214418
NM_000929	0.305875	NM_175550	-0.980689
NM_018280	0.640961	NM_001024952	-1.21489
	0.191708	NM_028390	-0.00247346
NM_021995	0.546152	NM_053204	-0.552308
NM_013268	0.70672	NM_178080	0.341676
NM_002195	0.810009	NM_011546	-0.989907
NM_030570	1.26394	NM_177152	0.0540286
NM_023089	0.377706	NM_020333	-0.431377
NM_020485	1.77356	NM_001008231	0.191246
NM_182508	1.06398	NM_001077696,NM_010412	0.608304
NM_016378	0.122281	NM_001081323	-1.00451
NM_018429	2.13994	NM_010121	0.240184
NM_001042683	0.893037	NM_001081499	-1.03861
NM_016955	1.18939	NM_023739	-0.473914
NM_001114123,NM_005229	0.438501	NM_017398	-0.556491
NM_020659	-0.145521	NM_009628	0.12866
NM_007061,NM_152243	0.194798	NM_181072	-0.656817
	0.900118	NM_010863	-0.142889
NM_014068	-1.33407	NM_174848	-2.23109
	2.00505	NM_001003918	-0.662
NM_138444	1.30585	NM_009680	-0.904664
NM_001136472,NM_004862,NR_024320	0.770926	NM_028475	0.343177
NM_001947	0.645722	NM_011131	0.147383
NM_001040192,NM_017833	-0.497793	NM_177721	-0.267643
NM_207437	1.31062	NM_170779	0.537948
NM_001014980	-0.336473	NM_172619	-0.364792
NM_173508	1.20484	NM_009211	-0.052102
NM_001946	0.947394	NM_001081238	-2.3467
NM_174896	-1.30623	NM_001113204	-0.751067
NM_001235	0.925873	NM_172493	-0.570986
NM_005276	0.428475		-1.39442
	-0.0470601	NM_172503	-0.363819
NM_022135	-0.717489	NM_020035	0.186784
NM_001040260	1.12381	NM_001039474	-0.530415
NM_006290	0.558658	NM_173765	-0.333504
NM_001008219	-0.686331	NM_153103	-0.0362937
NM_000345,NM_001146054,NM_001146055	-0.175914	NM_010589	-0.592842
NM_033516	-0.582724	NM_001146268,NM_008809	0.101752
NM_001105281	-0.716283	NM_198160	-0.665907
NR_027042	0.514818	NM_080448	-0.376764
NM_001005527,NM_182522	0.462688	NM_001037723,NM_001037724,NM_001109756,NM_007406	0.462759
	-0.0132774	NM_009188	-0.00557335
	2.27264	NM_001033528	0.548482
NM_018438	1.48369	NM_025695	-0.255829
NM_000413	-1.68858	NM_023579	-0.175702
NM_024631	0.504241	NM_011078	0.606455
NM_001322	-0.120673	NM_172596	0.77839
NM_001898	-0.0147712	NM_010829	-0.0344135
NM_005578	2.26037	NM_010601	-0.447829
NM_152715	1.95386	NM_172718	-0.256433
NM_153357	-0.0936299	NM_013661	-0.185321
NM_001033952,NM_001741	0.55956	NM_011843	0.981329
NM_152450	-1.01124	NM_015802	-0.0467936
NM_023925	-0.44309	NM_134037	-0.0112876
NM_001003665	-0.21661	NM_001081111	-1.38387
NM_001009609	1.16668	NM_008377	0.946576
NM_001077427,NM_144586	0.503432	NM_172283,NM_181666	-0.49652
NM_006390	1.27605	NM_024249	0.842711
NM_178865	-0.388619	NM_175255	-0.584469
NM_024059	-0.28078	NM_001083316,NM_011058	-0.82013
NM_004665	0.679725	NM_021530	0.0232563
NM_001828	-0.131595	NM_177608	-0.144674
NM_000625	-0.232695	NM_010026	0.214833
NM_005492	0.40858	NM_023045	-0.117776
NM_139159	1.38565	NM_001003909	-0.509273
NM_000517	0.0565142	NM_153808	-0.756357
NM_005332	0.17009	NM_172132	0.752456
NM_013447	0.460541	NM_146142	0.959256
NM_017893	0.912713	NM_011625	-0.298544
NM_004784	0.64945	NM_029282	0.43373
NM_057749	1.85336	NM_199446	-0.737391
NM_003508	0.754508	NM_001081037	-0.282896
NM_024709	0.587458	NM_001035525,NM_001035526	1.39593
NM_080390	1.96696	NM_009195	0.359468
NM_003378	-0.0214553		-0.674758
NM_080864	0.212336	NM_001081300	-0.837151
	0.902	NM_001110846,NM_009784	-0.39801
NM_004289	2.18255	NM_011390	0.276013
NM_020923	2.07298	NM_133907	0.340406
NM_017523	1.5799	NM_172409	-0.589354
NM_001005612,NM_001005615	1.19027	NM_013676	0.438578
NM_021059	-3.15045	NM_024267	0.264551
NM_005964	1.48522	NM_011263	0.714345
NM_012282	-0.162672	NM_001113283,NM_153584	-0.308227
NR_027276	0.018703	NM_021492	-0.063824
NM_014589	0.507233		-0.111207
NM_001039496	-0.448036	NM_172298	-1.91671
	0.0914699		0.919056
NM_018212	1.41479	NM_172598	0.146842
NM_178431	-2.22769	NM_172682	0.159394
NM_001077493,NM_002502	0.628063	NM_019729	0.16495
NR_026926	0.0984531	NM_139311	0.142822
NM_144718	1.54508	NM_173037	-0.00669933
	-0.63035	NM_018828	-1.38401
NM_153453	-0.587283	NM_001081144	0.320483
NM_031209	1.01422	NM_026102,NM_172464	-0.993296
NM_001029882	0.568984	NM_172790	0.417763
	0.176627	NM_198420	0.46324
	-1.53158	NM_010901	-0.254803
NM_020645	1.67253	NM_080446	-1.05852
NM_000590	0.0410883	NM_145158	1.12888
	2.04985	NM_001100452	-0.459133
NM_001142805,NM_005629	0.510299	NM_183034	0.840612
NM_000758	-0.169728	NM_009154	0.121372
	0.317161	NM_008397	-0.0275221
NM_138410	0.489266	NM_027886	0.37393
NM_014106	1.30266	NM_028451	0.495964
NM_004942	-0.152762	NM_020331	0.890003
NM_199437	1.41355	NM_001035226,NM_134014	-0.448486
	-0.997428	NM_001004156	0.0241063
NM_174895	-0.0666124	NM_001081011	-0.274221
NM_000300	1.50264	NM_001033189	0.753797
NM_001076778,NM_007177	0.38717	NM_178702	0.347409
NM_004756	-0.520633	NM_054093	0.704255
NM_001135920	1.46203	NM_001081107	-0.404952
NR_026862	-1.18187	NM_001122758,NM_018764	-0.222706
NM_138283	-0.329152	NM_027678	-0.0998008
NM_033520	0.796435	NM_133857	-0.488373
NM_006433	-0.734465	NM_028037	0.0674482
NM_198576	0.796082	NM_145070	0.567516
NM_152695	0.525104	NM_010804	-1.21935
NR_026666	-1.54774	NM_008839	-0.752505
NM_053002	1.69103	NM_024452	-0.203105
NM_017726	0.410913	NM_175303	0.568836
NM_032515	-0.998324	NM_153489	-0.10252
NM_024812	0.246105	NM_172755	-0.209412
NM_145013	1.17126	NM_183208	0.121166
NM_006365	-1.13739	NM_194346	0.781566
NM_173541	-0.22214	NM_009502	-0.172245
NM_032449	0.528878	NM_001160219,NM_001160220,NM_001160221,NM_030723	-1.21032
NM_006038	0.793932	NM_145519	0.534261
NM_003914	0.404795	NM_025441	-1.00085
NM_001118	0.0349417	NM_029094	-0.361704
NM_000558	0.192362	NM_146121	-0.0258839
NM_012400	-0.806743	NM_001139516,NM_011249	-0.740681
NM_138966	1.22931	NM_018884	0.789572
NM_005261,NM_181702	1.39951	NM_175168	-0.192719
NM_005431	0.748739	NM_007752	0.130059
NM_025165	0.95312	NM_001081396	-0.214942
NM_003251	0.0209374	NM_175137	0.232548
NM_002652	0.0854663	NM_009734	0.319959
NM_002188	-0.43502	NM_001113179,NM_009772	-0.0673818
NM_020741	0.833222	NM_172741	-0.250806
	0.091266	NM_001136085,NM_009457	1.34616
NM_152749	0.187239	NM_001033383	-0.431
NM_003775	0.832426	NM_177367	0.753225
NM_181684	-0.94141	NM_172965	0.831307
NM_012317	0.0273988	NM_001001980	0.122306
NM_174899	1.1766	NM_018878	-0.254229
NM_001785	0.0299951	NM_133817	-0.611811
	0.241585		0.429205
	-0.419331	NM_013918	-0.102099
NM_022459	0.848582	NM_016788	1.25781
NM_021614	0.14056	NM_144787	-0.0736948
NM_000371	0.450664	NM_001025067	-0.906872
NM_002413	0.635151	NM_013565	0.441641
	2.05891		-2.44167
NM_173803	0.259065	NM_010577	0.483067
NM_006449	1.54507	NM_172712	-0.507766
NM_139249	0.883023	NM_144921	0.994134
NM_033256	-0.115954	NM_010615	-0.636571
NM_001002758	-0.447153	NM_011767	-1.37816
NM_001012970	0.449266	NM_001024806	-0.185901
NM_001039886	0.397887	NM_009773	1.27045
	-0.168304	NM_130879	0.167251
NM_018129	1.64182	NM_019709	0.417114
NM_207307	0.352587	NM_001130409,NM_007982	0.0547634
NM_022360	1.01219	NM_009469	0.794525
NM_006683	-3.92173	NM_145076	-0.458717
NM_000559	0.483367	NM_053124	0.330047
NM_000518	0.526991	NM_175482	-0.473067
NM_176792	0.388538	NM_001159986,NM_033354	-0.729648
NM_198551	1.05869	NM_028705	0.177882
NM_032265	0.337156	NM_178655	-0.524068
NM_001080537	0.543969	NM_026101	0.345083
NR_027033	-2.08697	NM_183020	0.0343984
	0.368253	NM_172870	-2.48061
NM_001004343	0.509092	NM_138315	0.0989992
NM_001080407	0.752345	NM_134082	-0.351487
	1.29931	NM_001081279	-0.137888
NM_001134779,NM_016338	0.649107	NM_145633,NM_178263	0.420276
NM_181784	0.334325	NM_133886	1.15884
NM_002937,NM_194430,NM_194431	1.80795	NM_015731	0.980438
NR_024233	-0.718357	NM_173788	-0.0863182
NM_152387	0.461188	NM_033618	0.477501
NM_153685	0.544283	NM_026203	0.126442
NM_005855	0.136148	NM_009990	0.620307
NM_002091	0.242556	NM_139144	-1.60696
NM_000239	-0.196776	NM_177690	-1.23495
NM_020426	0.779269	NM_053123	-0.900292
NM_173575	1.66351	NM_008840	0.787006
NM_000928	-1.0802	NM_173868	-0.059652
NM_001025366	0.538945	NM_152894	0.124488
NM_005246	1.80971	NM_026987	1.46951
NM_206890	1.4898	NM_008402	-0.889138
	0.406698	NM_001110140	-0.474136
NM_153263	0.909072	NM_031408	-0.0202394
NM_152353	-2.05361	NM_198114	-0.403598
NM_024866	-0.143496	NM_001081219	-1.30832
NM_003181	-0.0891883	NM_133922	0.751508
NM_001145059	-0.602519	NM_015771	-1.04986
NM_004071	-1.21955	NM_001081092	-1.10644
NM_198892	1.34013	NM_027554	0.32349
NM_024060	0.746386	NM_015792	1.29639
NM_080657	1.83809	NM_145540,NM_178876	1.2631
NM_012301	-1.63494	NM_001033299,NM_001159683	-0.359158
NM_007144	0.44489	NM_028151	0.241043
NM_001323	-0.654453	NM_153774	0.429273
NM_017628	0.581687	NM_001098170,NM_001098171,NM_001098172,NM_011043	-3.44647
	0.187387	NM_001145965,NM_172910	0.00411513
NM_020705	0.898492	NM_016745	0.511461
NM_018941	0.574874	NM_173758	0.804288
NM_021915	0.465821	NM_029357	-1.43894
NM_004981,NM_152868	0.435245	NM_011379	1.10803
NM_007354	0.049251	NM_181517	-1.07182
NM_001007101	0.0682343	NM_007561	0.584586
NM_016205	2.3877	NM_013881	-0.790184
NM_001048210	1.82904	NM_028636	-0.342935
NM_001080507	-1.37916	NM_025483	-1.33575
NM_000097	1.19596		1.22307
NM_018208	0.491523		-4.52562
NM_007242	0.644286	NM_145131	0.27389
NM_004131	0.415865	NM_207255	-0.98579
NM_201997	-2.0558	NM_177562	0.92098
	0.379755	NM_001081045	-0.26504
NM_020161	0.17557	NM_001159404,NM_008502	0.806232
NM_173542	1.44919	NM_008875	0.167164
NM_015072	0.666707	NM_146007	1.17589
NM_145867	-0.127934	NM_001032413,NM_001032414,NM_028460,NM_152799	-0.149377
NM_203411	-0.146461		-0.026979
NM_006308	0.0422305	NM_134097	0.0518153
NM_033274	0.777251	NM_172382	0.516
NM_024919	0.127957	NM_001033150	0.377479
NM_001033045,NM_152529	1.90044	NM_010575	-0.349584
NM_015594	0.212547	NM_007963	-1.42383
	-0.596607	NM_027135	0.0311233
NM_033148	-0.142946	NM_031178	-0.403438
NM_002099	0.428608	NM_145975	0.32361
NM_017823	0.216293	NM_028152	0.204592
NM_181704,NM_182484	0.649526	NM_025690,NM_026337	0.489833
NM_145279	0.631333	NM_181541	-0.194365
NM_015885	0.374946	NM_172475	0.0648204
NM_015353	0.658022	NM_170759	-0.148379
NM_002302	0.351073	NM_001083808,NM_028188	0.0333506
	0.608105	NM_198162	0.115201
NM_152324	0.246217	NM_001081130	-0.251048
NM_000960	0.137999	NM_018831	-0.151563
NM_021257	0.299335	NM_146001	0.639262
NM_173622	1.02982	NM_001145826,NM_153406	0.0799031
NM_002928	0.632594	NM_001080774,NM_008659	0.576385
NM_001234,NM_033337	1.09731	NM_172706	-0.674169
NM_002557	-0.538616	NM_011711	1.38466
NM_006172	1.21406	NM_001039000,NM_008447	-0.860229
	0.877109	NM_145438	0.303838
NM_018207	0.824677	NM_181815	-0.939031
NM_005374	1.91572	NM_133852	0.769312
NM_145202	-0.295986	NM_001081351	-0.848498
NM_001001928,NM_001001929,NM_001001930,NM_005036	0.347326	NM_009933	0.370894
NM_032181	1.08224	NM_172827	-0.74117
NM_001042492	1.28296	NM_153126	0.0283471
NM_001430	0.889785	NM_146190	-1.00109
NM_003733	1.22497	NM_028627	-0.306813
NM_021948	-1.07117	NM_178890	1.86557
NM_000588	0.751206	NM_012027	0.754457
NM_002288	1.03266	NM_010956	1.02291
NM_153377	1.10689	NM_028820	0.257195
NM_003311	-0.550676	NM_144900	0.468432
NM_002232	1.54188	NM_001113354	-0.193139
NM_007055	1.21704	NM_133962	0.647922
	0.169993	NM_007958	-1.42749
NM_004878	0.592506	NM_130859	-1.20712
NM_032556,NM_173161	0.266867	NM_177429	-0.766703
NM_030580	-0.0938599	NM_133804	1.52142
NM_000170	1.83605	NM_008550	0.501862
NM_138697	0.376883	NM_176843	1.27795
	0.670547	NM_178246	0.453401
NM_001221	1.03756	NM_133918	0.430967
NM_001153	1.95223	NM_001081409	-0.900068
NM_001002919	0.478171	NM_145456	-1.46356
	0.217263	NM_027745	-0.24166
NM_000586	-0.112894	NM_146122	0.841847
NM_000589	-0.509995	NM_010435	0.543937
NM_032819	0.0219941	NM_001114663	0.263981
NM_005434	-0.253771	NM_026340	-0.11853
NM_033413	0.218118	NM_007415	1.38143
NM_001160047,NM_020784	2.31538	NM_133249	-0.442141
	0.436959	NM_010764	-0.0448583
NM_001110	1.4074	NM_198653	0.402419
	0.235906		-1.25094
NM_153210	0.54534		-2.40965
NM_004922,NM_198597	1.15786	NM_010716	0.426256
NM_015180	1.76637	NM_001081433	-0.739772
NM_000618,NM_001111284	-0.0423804	NM_010256	1.54101
NM_002375	1.20826	NM_172674	-0.273135
NM_004123	0.283903	NM_001081113	-0.154757
NM_001046	1.68287	NM_007905	-0.539528
	-0.151617	NM_013830	0.0324679
NM_018040	0.564415	NM_177390	0.193028
	0.191086	NM_001003672	-0.218858
NM_004380	1.5252	NM_144860	0.230512
	0.21019	NM_033072	-0.529084
	-0.530668	NM_021292	1.03197
NM_025054	0.840097	NM_197943	1.16594
NM_020928	0.881761	NM_001033292	-0.508811
NM_016531	0.319753	NM_172626	-1.14069
NM_004234	0.463019	NM_015772	0.522839
NM_001080505	0.225774	NM_027892	-0.414961
NM_052954	0.395211	NM_177698	-0.9457
NM_018125	0.0614392	NM_182995	-0.498702
NM_138331	-0.198208	NM_008619	-0.0796245
NM_001039569	1.44847	NM_019438	0.0771338
NM_002697	1.61682	NM_009210,NM_144959	-0.897555
NM_007188	2.22459	NM_009410	0.686687
NM_152612	0.8149	NM_175290	0.205295
NM_130760	-1.08713	NM_130455	-2.84529
NM_016521	0.434306	NM_174852	-0.47798
NM_144661	0.63473	NM_001146324,NM_080634	-0.549938
NM_005509	0.964619	NM_144825	-0.923388
NM_001128126	1.22831	NM_028136	0.196682
NM_006149	-0.915339	NM_172281	-0.171259
NM_020300,NM_145764,NM_145791,NM_145792	0.0169469	NM_172477	0.508521
NM_001010986	2.35729	NM_146039	-0.0847349
NM_015893	0.573206	NM_027900	-0.516952
	1.68146	NM_021395	0.668274
NM_022917	0.459528	NM_198109	-0.983217
NM_033377	-0.101383	NM_001029982	0.855603
NM_152357	0.293446	NM_172578	-0.250999
	0.879361	NM_001080746	1.00268
NM_000800	0.494659	NM_028874	0.842698
NM_002190	0.462946		-0.39608
NM_006658	0.357864	NM_146157	-0.837522
NM_173644	0.463322	NM_009722	-0.499781
	-3.69716	NM_001081164	-0.62561
NM_012275,NM_173170	0.407239	NM_053073	0.200232
	1.31778	NM_001001602,NM_001114124	0.349089
NM_016255	1.96895	NM_178112	0.843723
NM_182527	1.26406	NM_177861	-0.364977
NM_012382	2.01306	NM_009569	-0.227478
NM_030582	0.00358141	NM_013491	-3.07897
NM_144689	1.48407	NM_007504	0.233439
NM_032572	0.0425859	NM_010143	1.04246
NM_001039580	1.36208	NM_008385	0.573638
NM_001080424	0.54375	NM_178888	0.169056
NM_053024	2.04832	NM_028915	-1.07215
NM_000202	-2.47347	NM_146128	1.0937
NM_005433	0.869627	NM_029397,NM_170598	0.178035
NM_022470	2.55138	NM_001105246	0.758537
NM_002933,NM_198232,NM_198234,NM_198235	0.345661	NM_009755	-1.61865
NM_001080398	1.41222	NM_176923	-0.0389362
NM_020753	0.707402	NM_001029979	-0.259124
NM_001423	1.25515	NM_007562	-0.702188
NM_201380	0.888273	NM_033604	-1.22746
	0.950014	NM_145618	-1.2267
NM_000399	0.340278	NM_178686	-0.35117
	1.3157	NM_013511	-0.154065
NM_173178	0.0869748	NM_008676	-0.132871
NM_001146197	-0.854651	NM_011869	0.251141
NM_014992	1.73206	NM_001013813	-0.498167
NR_024249	-0.227038	NM_010144	1.77399
NM_003278	-1.10272	NM_001029936	-3.06497
NM_013333	0.517635	NM_181416	-0.80515
NM_001099407	0.466221	NM_007936	-1.41882
NM_005562	-0.984404	NM_029169	-0.122666
NM_001122961	0.573874	NM_173364	-1.0818
NM_177457,NM_177476,NM_177477	-0.0800588	NM_010142	1.86165
NM_182625	0.892341	NM_027480	0.315551
NM_015359	1.46474	NM_008487	0.185663
NM_002066	-0.0160212	NM_026476	-1.09807
NM_178517	-0.94747	NM_145138	0.932988
NM_024608	-0.809094	NM_021310	0.480198
NM_014440	-0.503338	NM_023743	-0.282985
NM_199053	1.42147	NM_134077	-0.607291
NM_004645	0.373693	NM_026670	-0.0547426
NM_144607	0	NM_130454	0.0362079
NM_173801	1.02228	NM_029348	0.00574886
NM_000663,NM_020686	1.51962	NM_001081016	0.561472
NM_000674,NM_001048230	1.8592	NM_145488	0.976161
NM_013431	0.119552	NM_027604	-0.801937
NM_173688	0.183095	NM_008985	0.94954
NM_001079537	1.5083	NM_178690	0.257466
NM_175875	0.470959	NM_212438	0.985158
	0.346616	NM_013581	0.642266
NM_020880	0.279073	NM_198608	0.120234
NM_152756	1.15741	NM_023051	0.466406
NM_001159352,NM_032044	0.645101	NM_176972	-0.958174
NM_005157	1.17724	NM_013626	0.364868
NM_152556	0.704978	NM_030690	0.509455
	-0.278701	NM_010365	1.23082
NM_020354	2.20546	NM_133752	0.556751
NM_002055	-0.179879	NM_023913	-0.25531
NM_004240	-0.0228303	NM_139061	-1.25515
NM_006705	-0.45143	NM_010139	0.1452
NM_031963	0.787065	NM_023738	-0.946809
NM_153341	0.87529	NM_172308	0.379793
	0.524339	NM_007458	1.50127
NM_015526	1.09858	NM_001081234	1.71293
NM_153229	-0.00780881	NM_009148	-0.119819
NM_001008529	0.372273	NM_029665	-0.636595
NM_001431	1.64539	NM_001042699	-0.291263
NR_026806	-0.109746	NM_199009	0.128198
	-0.990207	NM_146224	-0.928899
	0.0595604	NM_183146	-1.15546
NM_001008269	-1.14502	NM_173013	0.307832
NM_001010898	-0.659001	NM_182999	0.628831
NM_199286	0.666329	NM_172269	0.228507
NM_032195	0.914249	NM_001029993	0.822974
NM_006087	0.611253	NM_172722	-0.164544
NM_173633	0.322331	NM_023565	0.0121774
NM_182626	0.0568643	NM_011019	-1.04477
NM_001105518,NM_017673	-0.48251	NM_008689	0.348567
NM_144617	1.1282	NM_016678	0.513246
NM_000497	0.185924	NM_198101	-0.617429
NM_006943	0.785172	NM_001109995,NM_011431	0.308875
NM_015372	-0.375921	NM_145931	-1.08812
NM_014911	0.295968	NM_001001295,NM_172519	0.240565
NM_015074	1.43601	NM_001110142,NM_028288	-0.00193132
NM_014813	0.929913	NM_026221	-0.651283
NM_152495	0.429595		0.155146
NM_080625	1.96823	NM_178654	-0.624761
NM_017699	1.15707	NM_145409	0.568184
NM_003236	0.694539	NM_001081395	0.112664
NM_001076785,NM_003983	0.66321	NM_009621	-0.0111868
NM_002935	0.34553	NM_146217	1.34079
NM_002141	1.31158	NM_172498	0.604336
NM_182553	-0.34703	NM_133194	-0.416707
NM_022492	0.60015	NM_178632	0.132331
NM_002217	1.18658	NM_008486	-0.353068
NM_181600	-0.120865	NM_134257	0.51514
NM_012168	1.15484	NM_008861	-0.804962
NM_001004313	0.718674	NM_008060	-0.237799
	0.481233	NM_009288	0.396056
	0.646937	NM_194334	0.906148
NM_017869	0.221394	NM_024260	-0.122189
NM_018263	1.60364	NM_027256	-0.0256468
NM_057179	-1.33972	NM_027922	0.225224
NM_005213	1.02178	NM_001003934	-0.145698
NM_005250	-0.0864394	NM_001082536,NM_153049	1.03823
NM_006019,NM_006053	0.286743	NM_009055	-0.169424
NM_024768	0.758352	NM_008448	0.477807
NM_001130043	1.91001	NM_022655	-0.761436
NM_172037	1.62062	NM_146152	1.58689
NM_001143819,NM_017901	1.67323	NM_001081056	0.424565
NM_002934	0.690651	NM_199467	0.449285
NM_001039905	0.361162	NM_027815	0.419128
NM_022772	0.608421	NM_001081434	0.258299
NM_001163438	-0.527634	NM_016926	1.54302
NM_019589	1.28957	NM_011678	1.0767
NM_022098	0.31004	NM_001134384	-0.482744
	2.17606	NM_001045807	-0.886047
NM_004897	1.98213	NM_133816	0.862909
NM_001907	-0.761978	NM_033474	0.186576
	0.0218533	NM_008858	-0.0614984
NM_001233	0.440342	NM_011960	0.623306
NM_020931	1.01341	NM_153129	0.326738
NM_199043	0.780354	NM_197987	-0.224489
NM_017878	-0.661774	NM_019439	-0.504932
NM_198566	0.980886	NM_008001	1.28474
NM_021803	0.564536	NM_026295	1.11497
NM_005061	-0.636139	NM_177282	0.963106
NM_019050	2.43928	NM_019490	0.430151
NM_003660	0.543696	NM_001081956	0.411086
NR_027243	0.448267	NM_001040106	-0.656925
NM_021175	-1.96902	NM_028963	-1.00055
NM_152395	0.502886	NM_028315	0.578309
NM_001085480	0.0212076	NM_172508	0.082653
	0	NM_177841	0.705874
NM_032328	-0.15839	NM_030163	-0.239936
NM_015156	1.52977	NM_001004364,NM_001098168	0.0922595
NM_001160224	1.34885	NM_001014973	-1.50403
NM_031948	-0.68149	NM_153508	-0.628232
NM_017789	0.947313	NM_013691	-0.752199
NM_001661	0.353363	NM_054054	-0.816599
NM_018433	0.673906	NM_080855	0.364382
NM_024522	0.72497	NM_138630	-1.96255
NM_032890	0.940873	NM_001128169,NM_001128170	-0.49287
NM_003141	0.67633	NM_029606	-0.741446
NM_003611	-0.669793	NM_027357	0.0956879
NM_153038	0.365025	NM_175645	-0.497645
NM_153022	0.362879	NM_033370	0.512915
	0.0927812	NM_024245	0.13498
NM_015266	0.170644	NM_172729	1.27541
NM_005763	1.57316	NM_018785	-0.206144
NM_175858	-0.0074025	NM_001159324,NM_008064	0.183671
NM_052872	0.142594	NM_028762	1.2418
NM_198946	1.02729	NM_001128171,NM_173369	-0.215915
NM_032312	2.78962	NM_001146059,NM_001146060,NM_146228	-0.276458
NM_199165	0.0897876		-0.729808
NM_152470	0.709624	NM_030147	-1.2095
NM_033378	0.504354	NM_031397	0.184251
NM_144590	-0.76698	NM_001035854	-0.959504
NM_001010922	-0.40905	NM_011917	0.413175
NM_001199	0.0643607	NM_172671	-0.109758
	0.766875	NM_146153	0.577492
NM_002889	0.0741769	NM_177263	0.330292
NM_000389,NM_078467	0.175565		0.799904
NM_145805	0.688016	NM_207530	0.782636
NM_181720	1.33574	NM_176976	-1.15061
NM_005060	0.109604	NM_172121	-0.297295
	0.840744	NM_028782	1.34455
NM_153215	0.880644	NM_026439	1.43147
NM_003317	1.15074	NM_009893	-0.938361
NM_203424	0.454529	NM_029582,NM_134105	0.21097
NM_033407	1.12067	NM_001081160	-1.89398
NM_014433	0.0236371	NM_177645	-1.15163
NM_153183	0.757548	NM_172522	-0.99934
NM_198549	1.90407	NM_177262	1.29628
NM_013316	0.658454	NM_177267	-0.261705
	0.159603	NM_172276	-0.283795
	-0.0404615	NM_029770	1.85618
	0.329084	NM_026138	-0.0687784
NM_017584	-0.468277	NM_013846	-0.299808
NM_006677	1.22457	NM_133952	0.957211
NM_014011,NM_144949	0.0717213	NM_007454	0.714147
NM_004227	1.02548	NM_178884	0.752805
	0.0533102	NM_145970	0.731475
NM_014731	1.55125	NM_172495	-1.97681
NM_001609	1.93728	NM_016896	-0.78327
NM_138455	1.36702	NM_138310	0.124764
NM_001040177	1.49747	NM_001045529	-0.954851
NM_013355	1.42574	NM_175552	0.360313
NM_015550	1.17199	NM_172447	-2.02264
NM_152748	1.43538	NM_175515	-0.244676
NM_002674	0.343647	NM_001081292	-2.87989
NM_020651	1.91503	NM_177386	-0.105088
NM_001030015	0.0359003	NM_133701	0.988852
NM_021810	0.200053	NM_027889	0.523859
NM_000737	0.211092	NM_172615	-0.0504041
NM_002978	-1.23328	NM_177739	-0.0663369
NM_030949	-1.78895	NM_010438	0.118695
NM_033514	-0.396508	NM_001033430	-0.763836
NM_133473	0.693951	NM_001081141	0.192973
NM_000585,NM_172174	0.219766	NM_175114	-0.0987834
NM_152527	1.15987	NM_007459	1.39112
NM_018957	0.696167	NM_138585	0.532076
NM_198557	0.437102	NM_019572	0.133439
NM_153240	-0.266881	NM_178362	0.275655
NM_025041	0.362306	NM_001085450,NM_007615	0.0342649
NM_138621	1.08303	NM_016762	0.791528
NM_015071	1.17865	NM_172926	-0.365832
NM_000432	-0.323544	NM_053266	0.142934
NM_000619	0.416905	NM_138745	0.933438
NM_002909	0.912904	NM_008628	0.343888
NM_032205	0.568285	NM_177111	-0.636035
NM_152898	0.113337	NM_001085440	0.416754
NM_015726,NR_028104	1.52121	NM_199011	-0.34642
NM_022304	-0.220769	NM_008876	0.473212
NM_181900	-0.0829917	NM_146068	0.529096
NM_001135585	0.306808	NM_173400	-0.765244
NM_021961	1.05422	NM_027748	-0.109195
NM_006507	0.319285	NM_029332	-0.134188
NM_207442	-1.9876	NM_033592	0.657166
NM_003254	0.837034	NM_001083188,NM_010715	1.23293
NM_176813	-1.11018	NM_001039644	-0.48662
NM_020120,NR_027671	1.59409	NM_013784	-0.0683724
NM_203303	0.0343763	NM_011351	-0.526758
NM_017782	1.97174	NM_001077403	0.0933078
NM_001080434	0.379929	NM_001081034	-0.389598
	0.532258	NM_030711	-0.172991
NM_001010926	-0.194145	NM_011782	-0.413905
NM_015221	1.02389	NM_001110273,NM_001110274,NM_030683,NM_207651	-0.52257
NR_023921,NR_023922,NR_023923,NR_023924	1.57987	NM_009531	-0.130528
	0.637408	NM_026181	0.286665
NM_004354	0.520784	NM_198021	0.0450712
NM_005585	1.04152	NM_001038587,NM_001146296	0.262405
NM_018593	1.99831	NM_145627	1.16727
NM_001144872	0.374098	NM_028074	0.0814877
NM_174927	0.560318	NM_138306	0.0734485
NM_198400	1.58464	NM_172616	-0.420534
NM_000230	-0.120657	NM_027913	-2.39506
NM_007124	0.671379	NM_013813	0.646547
NM_152338	0.228462	NM_172304	0.0725127
NM_006732	0.119345	NM_138681	1.57764
NM_172004	0.458758		0.292308
NM_172006	0.235737	NM_172516	0.284747
NM_022644	-1.36716	NM_007862	-0.938899
NM_173509	-0.305667	NM_172689	1.47083
NM_022463	2.38691	NM_146205	0.953418
NM_080867,NM_199421	0.0352417	NM_177673	0.893701
NM_001424	0.0670836	NM_019933	-0.407677
NM_153342	-0.786393	NM_134010	0.111514
	0.324465	NM_013780	-0.554342
NR_026731	0.394012	NM_011495	-0.789763
NM_018121	1.32074	NM_025588	-0.736773
NM_001127183,NM_003879	1.64227	NM_015763	0.241618
NM_153746	2.1453	NM_177296	0.375617
NM_020386	-0.472562	NM_153543	0.418549
NM_016132	1.74883	NM_008737	0.767689
NM_015191	1.58667		-0.0361363
NM_080664	0.122817	NM_146055	0.332041
NM_022469	0.0575051	NM_030205	-0.180543
NM_182541	0.525567		-0.851768
NM_002825	0.240114	NM_029930	-0.00803765
NM_138400	1.47167	NM_198664	-0.0634795
	0.19382	NM_019963	-0.725464
NM_001249	0.818613	NM_001159284,NM_013870	1.07203
	0.955236	NM_009029	-0.481336
NM_130446	1.53458	NM_001081131	-0.159024
	0.46867	NM_145628	0.0218054
NM_031924	1.32535	NM_145124	0.732606
NM_001131009,NM_002835	1.53432	NM_008942	0.680675
NM_001432	-0.0416209	NM_009616	0.230861
NM_005985	0.161848	NM_028601	0.4984
NM_019618	4.60663	NM_010945	0.261013
NM_002210	1.47738	NM_001130153,NM_008488	1.82793
NM_033266	0.553436	NM_181400	-0.0880592
NM_013292	0.205396	NM_001110013	-0.802279
NM_178840	0.115699	NM_018788	-0.176822
NM_001102594,NM_001102595,NM_020892	-0.436676	NM_029546	0.399236
NM_001040653	1.25361	NM_001025392,NM_153787	-0.69826
NM_001017921	0.805675	NM_138665	1.22356
NM_001039693	0.400343	NM_026110	-1.58702
NM_031459	0.712442	NM_172692	0.130889
NM_001004440	1.48845	NM_053201	1.01564
NM_003761	-0.821595	NM_177327	-1.1797
NM_020637	-0.131661	NM_175025	0.0585252
NM_005640	1.66694	NM_001008791,NM_001008798	0.0504523
NM_002632	0.576979	NM_001130477,NM_016799	-0.331987
NM_000522	0.888259	NM_133921	-0.0713433
NM_006183	0.213876	NM_001042719	-0.043756
NM_007271	2.2479	NM_001146100	0.416315
NM_080671	-0.598062		-1.41532
NM_004345	0.320125	NM_001081193	-0.60058
NM_014424	0.294013	NM_013820	-0.749057
NM_145048	1.61159	NM_008319	-0.245782
NM_173846	0.702485	NM_015769	-0.120244
NM_138813	1.26434	NM_153556	0.379382
NM_178339	-0.162474	NM_133917	1.28629
NM_000747	-0.0771568	NM_010560	0.234433
NM_033506	0.805251	NM_170757	0.250839
NM_003381	0.587278		-0.767732
NM_014582	0.404406		0.693815
NM_014581	-0.701376	NM_023799	0.128597
	0.694266	NM_028846	0.756381
NM_032825	0.26008	NM_022654	-0.957906
NM_018402	0.308705	NM_175180	-1.11746
NM_032775	0.824378	NM_177857	-0.0737302
NM_006741	-0.203688	NM_031406	-0.109871
NM_012101	-0.43492	NM_172406	-0.693021
NM_015980	0.55544		-1.03627
NM_032466	1.36886	NM_007619	-0.417029
NM_023073	0.91372	NM_173382	-0.697409
NM_138344	0.602191	NM_024451	-0.0582562
NM_021916	1.69605	NM_001080924	-0.678333
NM_001012423	-0.479817	NM_021895	0.136093
NM_014598	1.29881	NM_013733	0.738772
NM_194317	0.526363	NM_007584	1.11345
NM_000749	-1.08449	NM_146200	0.603016
NM_000924	-0.406679	NM_175344	-0.0170152
NM_002906	1.75984	NM_176953	0.292985
NM_020722	1.71602	NM_019776	0.724478
NM_001031735	-1.01631	NM_207225	0.579708
NM_145291	0.0845299	NM_175347	0.343369
NR_024407	-0.0700385	NM_139153	0.214257
NM_006329	-0.499714	NM_018817	-0.251735
NM_144652	-0.285295	NM_080561	0.0791664
NM_000493	-2.44894	NM_172796	0.551283
NM_017541	-1.55399	NM_001080755,NM_198416	-0.563598
NM_003468	1.97558		-0.546138
NM_004066	0.447577	NM_172473	0.271311
NM_006553	0.574261	NM_172606	-0.378756
NM_181599	0.681577	NM_009900	-1.02259
NM_001142684	-0.215238	NM_134101,NR_027485	1.5627
NM_015365	1.80024	NM_007872	-0.133418
NM_001532	-0.343921	NM_177364	0.760893
NM_012411	1.31534	NM_172643	-0.97116
	0.322537	NM_183149	0.467967
NM_003995	-0.71649	NM_177331	-0.749672
	0.98657	NM_030560	-0.160653
NM_002011,NM_213647	0.46478	NM_133999	1.39734
NM_000394	-0.0186486	NM_001024846	-0.77193
NM_006128	0.54039	NM_025819	-1.22772
NM_024762	-0.33449	NM_027901	0.607885
NM_001160301	0.861968	NM_008165	0.830947
NM_018218	1.80207	NM_013507	-0.101745
NM_002225	1.83944	NM_007944	-0.660141
NM_017817	0.3345	NM_007664	-0.258141
NM_145276	0.999023	NM_007683	-0.308863
NM_017576	0.0352087	NM_029049	-0.725324
NM_004874	2.0798	NM_009818	0.897352
NM_003480	1.1567	NM_001048167,NM_010837	-0.418826
NM_001030060	0.376793	NM_198031	0.116925
NM_001992	1.83201	NM_133755	1.381
NM_014333	2.23575	NM_015827	1.54305
NM_019089	0.611194	NM_008813	-0.911822
NM_004775	1.52722	NM_181411	-1.03978
NM_004271	0.0203864	NM_008564	1.05105
NM_153223	1.31477	NM_178609	-0.227249
NM_006891	-0.838525	NM_201364	0.295004
NM_020989	1.19227	NM_027406	-0.167347
NM_004285	1.41066	NM_001003913	1.20124
NM_014617	0.448136	NM_153168	-0.876007
NM_004753	1.0709	NM_001085373,NM_001085374	0.948615
NM_138564	-0.542072	NM_023699	0.913078
NM_018948	1.53082	NM_133247	-0.99883
NM_203412	0.185525	NM_012031	-2.95992
NM_031957	0.557463	NM_177340	0.20105
NM_017781	1.39821	NM_027270	0.0879534
NM_021223	0.00326203	NM_177215	0.402621
NM_001039374	-2.26909	NM_013456	0.585846
NM_001009814	0.856075	NM_026539	1.45854
NM_005854	0.473487	NM_175477	0.671916
NM_005210	0.788291	NM_001080995	-0.630813
NM_019044	0.768781	NM_001110015,NM_001110016,NM_144863	1.0369
NM_001008387,NM_198448	0.778129	NM_019408	1.08852
NM_032175	1.85046	NM_024289	1.27505
NM_020729	1.3272	NM_001042707,NM_010561	-0.463412
NM_000213	-0.0058389	NM_178716	0.00135644
NM_020806	0.226581	NM_001081308	0.199654
NM_017682	0.342393		-3.48331
NM_004428	0.954962	NM_001122843,NM_145390	0.29012
NM_004458	1.5528	NM_144872	0.623199
NM_144695	0.78829	NM_001159964,NM_007943	-0.0575493
NM_000405	1.32671	NM_009806	0.222002
NM_001130448	0.716182	NM_001013581	0.738406
NM_182681	0.247348	NM_007780	-0.361456
NM_001003395	0.247212	NM_001081357	-0.624323
NM_002580,NM_138937,NM_138938	0.304458	NM_174850	0.705576
	-0.233031	NM_134092	-0.0499483
NM_080927	1.84721	NM_008642	-0.0469012
NM_001374	-2.24903	NM_001035533	0.352518
NM_001817	0.924299	NM_001081223	-0.775694
NM_178313	1.20354	NM_177643	-0.549362
NM_004923	2.01676	NM_022882	0.222008
NM_016184	-0.17897	NM_001098203,NM_010430	0.829837
NM_052886	0.21919	NM_010017	0.676961
	1.3647	NM_134156	0.028316
NM_006228	0.328599	NM_021343	-0.137176
NM_012409	0.285791	NM_028906	-0.387621
NM_145343	0.546098	NM_001081170	-0.318203
NM_001144954	0.48951	NM_001122899,NM_010704	-0.0860873
NM_020649	0.250488	NM_001081161	-0.110544
NM_018724	0.45856	NM_001081009	-0.0420742
NM_057175	1.78754	NM_021506	0.222763
NM_138411	0.821142	NM_029389	-0.269899
NM_002297	0.514527	NM_011716	0.526749
NM_004747	1.44925	NM_029239	-0.799933
NR_024126	-1.02649	NM_007386	-0.0628781
NM_080662	1.44545	NM_175489	0.368074
NM_000880	0.812564	NM_009465	1.61619
NM_002702,NR_026893	0.411134	NM_009582	-0.518423
NM_005843	1.5223	NM_001035231	-1.59651
NM_139172	0.517554	NM_009004	0.903818
NM_001163561,NM_173649	-0.28779	NM_001008549	-0.362932
NM_001670	0.77922	NM_016699	-0.0714214
NM_030967	-0.142429	NM_008255	0.0298272
NM_145304	0.146075	NM_027545	-0.464889
NM_005937	0.95669	NM_010890	1.4953
NM_012408	-0.038738	NM_181414	0.00167188
NM_172367	-0.170536	NM_001130456,NM_013662	0.675112
NM_001031737	-0.241989	NM_172824	-1.41504
NM_001013625	-0.0492018	NM_139303	-0.263669
NM_032372	1.56718	NM_001039556	-1.40353
NM_138812	0.790994	NM_147153	-0.302103
NM_002456	0.591515	NM_027264	-0.929261
NM_032489	-1.48922	NM_027290	0.380996
NM_003893	0.448706	NM_001081382	0.377083
NM_024947	0.798705	NM_029413	-0.114739
NM_020918	1.51745	NM_172787	0.164228
NM_001104577,NM_017986	0.326265	NM_010811	0.918468
NM_000795	-0.346762	NM_001077661	1.16322
NM_001286	-0.0456151	NM_008715	-0.58661
	1.81908	NM_001033194	0.577368
NM_153040	1.15824	NM_008306	0.792044
NM_022737	0.608904	NM_029404	0.538997
NM_001753	0.360743	NM_019392	0.730873
NM_001080430,NM_001146188	0.258706	NM_001003919	-0.38685
NM_021070	0.6956	NM_178415,NM_181316	0.688182
NM_001610	1.013	NM_172830	-2.37212
NM_005807	2.09516	NM_175518	-0.950379
NM_001956	0.535991	NM_021307	-0.855519
NM_031458	1.4501	NM_027980	0.539866
NM_001024656	0.547257	NM_178775	-0.0548315
NM_000572	-0.101374	NM_011197	0.672052
NM_018240	0.619428	NM_177762	-0.264919
NM_024943	0.656107	NM_030109	1.33496
NM_007029	0.264307	NM_198308	-0.442478
NM_003206,NM_198392	-0.503608	NM_172768	0.275651
NM_019839	-0.249012		-0.702958
NM_199077	1.85391	NM_172652	0.544843
NM_015283	2.3522	NM_026576	-0.980773
NM_018219	-0.318855	NM_008379	0.242873
NM_001429	2.44019	NM_144850	0.0256937
	1.08575	NM_016692	-0.15855
NM_031916	0.928506	NM_001033445	0.923805
NM_020525	0.594131	NM_199466	-0.196766
NM_001114396,NM_002262	-0.016426	NM_177293	-0.206457
NM_017805	-0.0311982	NM_145374	0.0917917
NM_198457	0.641453	NM_001109909,NM_001109910,NM_031405	1.02933
	1.44574	NM_029936	0.877582
NM_173529	1.9219	NM_178900	0.669098
NM_016246	-1.25399	NM_134005	-1.59351
NM_001202,NM_130850,NM_130851	1.4361	NM_175934	0.474639
	2.37785	NM_001122640,NM_144529	0.602723
NM_021798,NM_181078,NM_181079	1.20148	NM_028041	2.4501
NM_014443	0.228363	NM_017477	0.382369
NM_004727	2.50713	NM_013571	0.84708
NM_001018049,NM_002571	0.65672	NM_009954	1.21067
NM_152670	0.486739	NM_001001160	-0.6529
NM_152373	-0.254199	NM_001081473	-0.0542396
	-0.744118	NM_001042438,NM_009572	-1.23121
NM_020654	0.226526	NM_177320	0.570372
NM_173630	0.438045	NM_017478	2.01818
NM_016023	1.32303	NM_198018	1.23303
NM_001327,NM_139250	0.596047	NM_022017	-0.642282
NM_015466	0.810129	NM_011929	-0.794654
NM_133456	0.410415	NM_025830	0.0743108
NM_139173	1.02511	NM_177461	0.123862
	2.29509	NM_153530	-0.208074
NM_002054	0.962348	NM_001039520	0.499367
	0.414019	NM_001025393	0.377791
	0.83861	NM_011668,NM_173010	-0.722291
NM_007053	0.74525	NM_011052	0.903822
NM_032576	-0.309976	NM_010349	-0.159811
NM_003332	-0.343663	NM_197993	0.234423
NM_014030	0.953842	NM_021323	-2.10867
NM_031442	0.335664	NM_001040131	1.2077
NM_020421	1.32178	NM_139227	-0.941107
NM_015603	0.497175	NM_001033274	-0.335787
NM_138705	-0.0561713	NM_001003815	0.166305
NM_003617	0.892278	NM_177226	0.170412
NM_033358	-0.936682	NM_025979	-0.734505
NM_001042537	1.78843	NM_053089	-0.473552
NM_020646	0.334949	NM_008359	1.21745
NM_145914	0.702811	NM_025832	-1.00951
NM_033188	0.734523	NM_001037722	1.81708
NM_022830	0.309168	NM_010065	0.4675
NM_022152	1.08156	NM_008395	-1.27151
NM_021033	1.97708	NM_153587	0.829493
NM_001139444	0.186378	NM_172481	-2.33614
NM_020800	0.691327	NM_009733	1.0817
	1.5058	NM_001081374	0.298535
	0.177984	NM_008565	0.363646
NM_004113	0.665734	NM_011624	0.435492
NM_015993	0.286235	NM_010700	-0.331543
NM_001159601,NM_004249	0.431765	NM_172624	1.22774
NM_005814	0.967077	NM_015744	-0.734313
NM_206920	-0.940127	NM_026779	0.947457
NM_019060	-0.326342	NM_019400	-0.278792
NM_014780	0.673153	NM_013660	-0.858238
NM_003575	1.45833	NM_080638	1.07817
NM_001541	0.258355	NM_172779	-1.93614
NM_005212	0.694211	NM_175244	0.879025
NM_001099642,NM_018348	0.700798	NM_001103178,NM_178688	0.513953
NM_001017395	0.277663	NM_153177	-0.33865
NM_144727	0.189348	NM_001085371	-0.0563757
NM_001008740	0.350511	NM_029278	0.614975
NM_025247	0.258851	NM_153178	0.208701
NM_052846	0.085962	NM_144550	-2.24315
	1.1127	NM_001013368	-0.173589
NM_015139	1.54824	NM_153402	-0.629777
NM_153702	1.12443	NM_001013025	0.611222
NM_178545	-0.28254	NM_144871	-0.325227
NM_019859	1.16569	NM_013753	0.545685
NM_080831	0.484015	NM_144922	0.292213
NM_020824	2.15129	NM_001122768,NM_178701	0.461833
NM_181785	1.92074	NM_001003961,NM_001122997	-0.464773
NR_027129	-0.164501	NM_009442	0.159063
NM_000251	-0.933313	NM_172814	-1.21344
NM_017707	1.16638	NM_031872	-3.70519
NM_001145923,NM_020843	0.902786	NM_175437	-0.186107
	-2.77763	NM_029279	-0.364181
NM_130467	1.13267	NM_028639	1.33072
NM_022048	1.16129	NM_013700	1.15615
NM_020718	0.932847	NM_007907	-1.69522
	-0.463428	NM_173002	0.76745
NM_152376	1.1803	NM_013559	0.148435
NM_001004306	0.812216	NM_023773	0.620528
NM_001099456	1.15063	NM_001042541,NM_009648	-0.29647
NM_078469	1.73439	NM_178119	0.945044
NM_205842	1.77975	NM_020494	0.526181
NM_030797	1.38161	NM_153403	0.720831
NM_001012974	-1.54492	NM_010117	-0.512078
NM_139240	0.211436	NM_028815	1.15295
NM_033085	0.346995	NM_011596	1.02919
NM_001135247,NM_001135248,NM_002403,NM_017459	0.499527	NM_144557	-0.727351
NM_152536	1.75983	NM_172894	0.670959
NM_014946	2.26045	NM_026156	0.257633
NM_001343	-0.0547341	NM_026171	-0.284254
NM_001192	0.286963	NM_145400	-1.243
NM_005096,NM_201599	1.17479	NM_176987	-0.528198
NM_139282	0.310972	NM_001114386,NM_031881	0.830022
NM_014678	1.18432	NM_007715	-0.59698
NM_173197	0.428455	NM_027881	0.411873
NM_001100913	0.239598	NM_001033457	0.141167
NM_001036645	2.03942	NM_022563	0.0141218
NM_020733	2.09572	NM_001081265	0.686006
NM_175734	0.670893	NM_054089	-1.2221
NM_006760	0.346404	NM_172120	0.594236
NM_017552	1.18363	NM_133872	1.00946
NM_003835	0.594042	NM_025943	-1.68912
NM_013372	0.163056	NM_012048	-0.995128
NM_021819	0.00749636	NM_009058	0.417792
NM_203347	-0.283444	NM_025827	0.541206
NM_030824	-0.118534	NM_018786	-1.36832
NM_003101	2.16036	NM_146084	-1.41512
NM_182536	0.760552	NM_019553	0.411079
NM_005934	0.299937	NM_001039179	0.103402
NM_199464	-0.151083	NM_022012	1.02306
NM_178172	0.454418	NM_011578	-0.685444
NM_003909	1.60857	NM_028724	-0.106342
NM_014602	1.004	NM_018774	1.23438
NM_018700	1.33336	NM_016747	0.566099
NM_014286	0.862135	NM_177566	-0.0458599
NM_031430	-1.20899	NM_177045	1.0888
NM_001099270	0.286699	NM_022883	0.508454
	0.165307	NM_152817	0.852052
NM_139321	1.27018	NM_053268	-0.594456
NM_001007255	0.428235	NM_134134	1.14315
NM_006911	0.957923	NM_181542	0.438128
NM_172095	-0.313947	NM_201519	0.132377
NM_031313	0.465423	NM_010771	-0.755797
NM_001890	0.427374	NM_207213	-0.0808876
NM_018378	-0.0797525	NM_001081240	-0.0678883
	-1.14542	NM_144941	1.41456
NM_144975	0.4382	NM_199304	-0.0212916
NM_000767	-0.482995	NM_172845	0.160717
NM_018295	0.12794	NM_001081090	0.404093
NM_001124	-0.163304	NM_007404	0.522668
NM_032648	0.0814256	NM_028731	-0.587385
NM_001029881	0.696707	NM_028412	0.308367
NM_001995	1.80727	NM_001134460,NM_001134461	-0.516058
NM_001031679	1.401	NM_029456	-0.27662
NM_004459	2.11179	NM_183408	0.393019
NM_080552	0.687506	NM_001081222	-0.743213
NM_139214	0.363509	NM_177034	0.472338
NM_153714	0.553122	NM_031873	0.499332
NM_175075	0.324724	NM_145611	0.519265
[truncated: 13,052 more rows]

## Sheet: Sheet1
	Translation of mRNA encoding some abundant proteins in NIH3T3 and Jurkat
Gene name	Human Ref Seq	log2P/FM control	log2 P/FM stress-control	A value	mouse Ref Seq	log2P/FM control	log2 P/FM stress-control	A value
ACTB	NM_001101	2.27479	-2.29625	13.9081	NM_007393	1.68527	-1.7545	10.6466
ACTG1	NM_001614	0.841212	-0.139925	15.9406	NM_009609	1.05548	-1.37999	13.6019
ANXA1	NM_000700	1.57019	-1.35333	12.2031	NM_010730	2.44312	-1.3239	12.9713
ANXA5	NM_001154	1.9498	-2.08299	11.238	NM_009673	1.70494	-1.03374	11.238
ATP5b	NM_001686	2.20139	-1.46351	14.2953	NM_016774	1.98315	-2.52071	11.1693
CALR	NM_004343	2.18574	-2.54427	14.0717	NM_007591	0.439924	-0.0137483	11.5897
CCT5	NM_012073	1.8103	-1.7848	11.0692	NM_007637	0.324692	-1.40545	13.8852
Cfl1	NM_005507	1.64077	-2.56942	13.6994	NM_007687	2.31747	-3.29019	12.3419
COTL1	NM_021149	1.93706	-3.07005	9.93086	NM_028071	1.89377	-2.93808	10.341
EIF4AI	NM_001416	1.31317	-0.542089	13.5739	NM_144958	1.25261	-0.742331	11.2685
ENO1	NM_001428	2.00417	-0.984798	14.3347	NM_023119	2.01504	-2.03264	10.8183
GSTO1	NM_004832	2.75424	-4.65476	14.9629	NM_010362	2.21152	-3.2964	14.5027
HNRNPK	NM_031262	1.56693	-0.498804	11.5967	NM_025279	1.32422	-1.87033	11.0347
HSP90B1	NM_003299	1.87834	-0.0604703	12.2665	NM_011631	0.461512	-0.00402005	12.16
HSPA5	NM_005347	2.02888	0.530613	9.16719	NM_022310	1.06478	1.36067	11.9066
HSPA9	NM_004134	2.04137	-0.851139	10.7801	NM_010481	0.600295	-0.242513	10.3782
HSPD1	NM_002156	2.08695	-1.4978	13.2753	NM_010477	0.336193	-0.343608	11.6794
LDH-B	NM_002300	0.724078	-1.77805	16.7859	NM_008492	2.59356	-3.26513	10.9755
MDH1	NM_005917	2.0984	-1.54174	15.3388	NM_008618	2.89087	-1.60183	10.4574
MSN	NM_002444	2.17157	0.332695	9.1961	NM_010833	0.647953	0.727519	6.7138
NPM1	NM_002520	0.998577	-3.08006	6.89657	NM_008722	0.320155	-2.87961	14.2618
P4HB	NM_000918	1.5278	-1.95086	13.8476	NM_011032	1.65475	-2.31947	11.8157
PGAM1	NM_002629	3.39184	-2.68172	14.369	NM_023418	1.82069	-1.2103	14.622
PGLS	NM_012088	1.18487	-2.93992	13.4459	NM_025396	1.11581	-3.20382	11.4474
PNP	NM_000270	1.67485	-0.713251	14.6779	NM_013632	0.906903	-0.139813	6.03464
PRDX1	NM_002574	3.34777	-1.91071	14.9214	NM_011034	3.4955	-1.95208	12.1001
Prohibitin	NM_002634	2.10365	-0.450579	12.5322	NM_008831	1.23802	-0.846493	11.2495
Prot-a2	NM_002787	2.02351	-3.37645	14.4656	NM_008944	2.21171	-2.55165	12.7821
Prot-a3	NM_002788	2.57952	-3.42525	14.2035	NM_011184	1.76572	-2.20677	10.5287
Prot-a4	NM_002789	2.41031	-2.66052	13.7812	NM_011966	2.83116	-2.69094	9.86343
Prot-a5	NM_002790	2.2197	-2.44779	14.4008	NM_011967	2.16321	-2.40509	12.0991
Prot-a6	NM_002791	1.92644	-2.97881	16.1501	NM_011968	3.26699	-3.03391	11.2966
Prot-a7	NM_002792	1.54347	-3.39166	15.1948	NM_011969	2.63848	-3.86087	12.7172
Prot-b2	NM_002794	2.74329	-2.87905	13.3904	NM_011970	3.11642	-3.33299	8.94918
Prot-b3	NM_002795	2.54281	-2.48785	13.0946	NM_011971	2.52946	-3.10676	13.114
Prot-b4	NM_002796	0.325305	-1.29652	15.9877	NM_008945	2.17316	-3.45099	13.9937
Prot-b5	NM_002797	0.906188	-1.44832	14.0918	NM_011186	3.12745	-3.41515	11.9504
Prot-b6	NM_002798	2.80468	-3.30714	14.7844	NM_008946	2.49204	-3.88786	12.4505
Prot-b7	NM_002799	1.44231	-1.88703	15.7071	NM_011187	2.82427	-2.07157	10.607
SOD1	NM_000454	2.74964	-4.10977	15.6444	NM_011434	2.01658	-4.04707	13.9535
STMN1	NM_203401	2.70833	-4.42507	17.1043	NM_019641	1.8193	-2.93715	11.5974
TUBB2A	NM_001069	1.16318	-1.26661	13.2435	NM_009450	1.26946	-1.53621	11.6353
TUFM	NM_003321	1.54187	-2.01748	14.3406	NM_172745	1.61069	-2.34715	11.2697
VIMENTIN	NM_003380	1.14077	-1.60542	14.7245	NM_011701	0.234419	-2.06782	14.3919
YWHAG	NM_012479	2.01636	-0.904147	10.942	NM_018871	1.77895	-0.937075	10.235
YWHAZ	NM_145690	2.18599	-2.14506	12.3191	NM_011740	1.40738	-1.03449	8.99038
